# Supplementary material for: Unusual polar ordering and room-temperature blue phase stabilization in tetrafluorinated bent-shaped mesogens
Source: Royal Society of Chemistry journal article supplement (doi:10.1039/d5sc01530h), 2025-01-01
Supplement: d5sc01530h2.pdf [file d5sc01530h2.pdf]

## Electronic Supplementary Information

### Unusual Polar Ordering and Room-Temperature Blue Phase Stabilization in Tetrafluorinated Bent-Shaped Mesogens

Anshika Baghla,<sup>†a</sup> Mudit Sahai,<sup>†b,c</sup> Neelam Yadav,<sup>b</sup> Santosh Prasad Gupta,<sup>d</sup> Vidhika  
Punjani,<sup>a,e</sup> V. Manjuladevi,<sup>c</sup> Jagdish K. Vij,<sup>\*b</sup> Santanu Kumar Pal<sup>\*a</sup>

<sup>a</sup>Department of Chemical Sciences, Indian Institute of Science Education and Research (IISER) Mohali,  
Sector-81, Knowledge City, Manauli-140306, India;  
E-mail: skpal@iisermohali.ac.in

<sup>b</sup>Department of Electronic and Electrical Engineering, Trinity College Dublin, The University of Dublin,  
Dublin 2, Ireland;  
E-mail: jvij@tcd.ie

<sup>c</sup>Department of Physics, Birla Institute of Technology and Science, Pilani (BITS Pilani), Rajasthan, 333031,  
India

<sup>d</sup>Department of Physics, Patna University, Patna-800005, India

<sup>e</sup>Centre of Molecular and Macromolecular Studies, Polish Academy of Sciences, 90-363 Łódź, Poland

<sup>†</sup>(Joint first authors)

## Table of contents

|     |                                         |
|-----|-----------------------------------------|
| 1.  | Experimental details                    |
| 2.  | Synthesis and Chemical Characterization |
| 3.  | Polarized Optical Microscopy            |
| 4.  | Differential Scanning Calorimetry       |
| 5.  | Small-angle/Wide-angle X-Ray Scattering |
| 6.  | Structure-Property Relation             |
| 7.  | Birefringence Measurements              |
| 8.  | Dielectric Spectroscopy                 |
| 9.  | Spontaneous Polarization Studies        |
| 10. | Electroconvection Studies               |
| 11. | Blue Phase Induction Through Doping     |
| 12. | Density Functional Theory Calculations  |
| 13. | References                              |

## 1. Experimental details

**Materials:** Chemicals and solvents of analytical reagent (AR) grade were used directly without further purification. Column chromatography separations were carried out using silica gel with particle sizes of 100-200 mesh and 60-120 mesh. Thin-layer chromatography (TLC) was performed on aluminum sheets pre-coated with silica gel (Merck Kieselgel 60, F254). Commercially available S811 and 5CB were procured from TCI chemicals.

**Instrumentation:** The instrumentation details for structural characterization (including NMR, FT-IR, and UV-visible spectroscopy), thermal analysis, polarized optical microscopy (POM), and small-angle/wide-angle X-ray scattering (SAXS/WAXS) have been previously reported.<sup>1</sup> 2D images for SAXS/WAXS measurements were processed using ImageJ software. Differential scanning calorimetry (DSC) was done using a Mettler Toledo DSC 821e. Birefringence measurements were carried out using an Olympus BX 52 Polarizing Optical Microscope, with samples placed in planar (antiparallel buffing) and homeotropic alignment cells obtained from E.H.C. Co. Ltd, Japan, and transmittance measured via an Avantes AvaSpec-2048 fiber spectrometer. Dielectric spectroscopy (DS) measurements were conducted using broadband alpha high-resolution dielectric analyzer (Novocontrol GmbH, Germany). Indium tin oxide (ITO) coated glass substrates with different sheet resistances ( $\sim 10 \Omega/\square$  and  $\sim 200 \Omega/\square$ ) along with Mylar spacers of 9  $\mu\text{m}$  thickness were used to construct the lab-made LC cells for the dielectric measurements. Planar and homeotropic alignments were achieved by spin-coating ITO glass substrates with RN1175 (Nissan Chemicals, Japan) and polymer solution AL60702 (JSR, Korea), respectively. The temperature of the sample cells was stabilized to within  $\pm 0.02^\circ\text{C}$  using a Eurotherm 2604 temperature controller. DFT calculations were performed using Gaussian 16 and GaussView 5.0.

## 2. Synthesis and Chemical Characterization

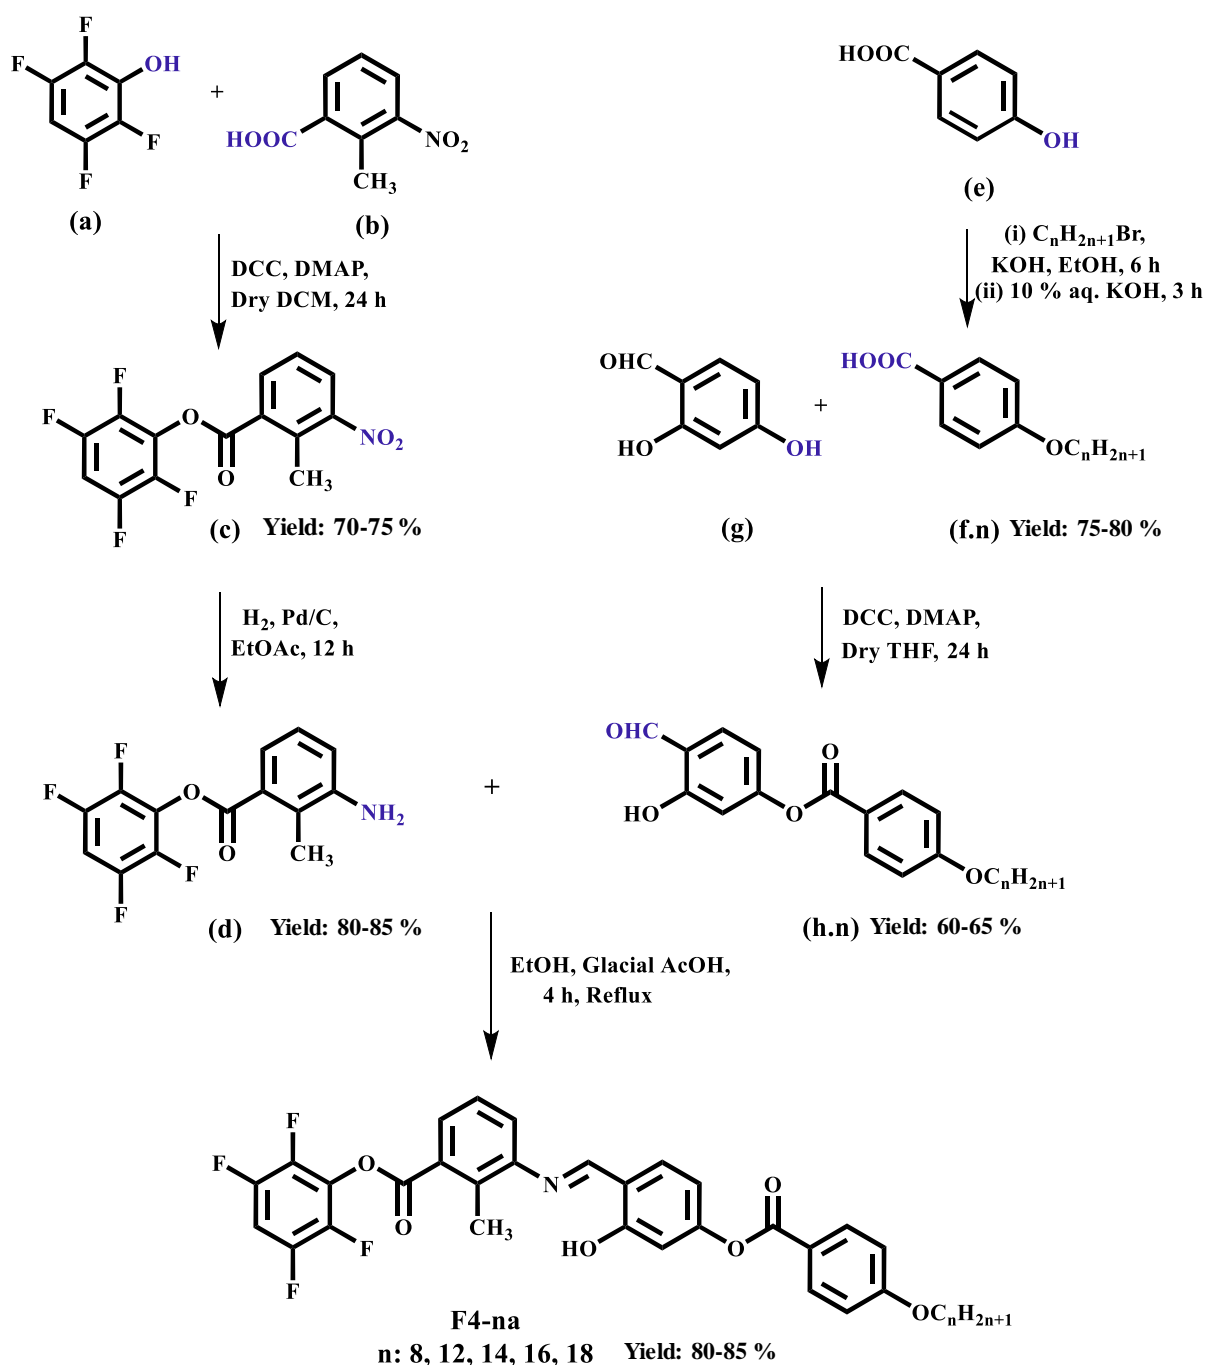

**Scheme S1.** Synthetic scheme for **F4-na** series of compounds.

### Synthesis of compound (c) 2,3,5,6-tetrafluorophenyl 2-methyl-3-nitrobenzoate

The intermediate compound (c) was synthesized via Steglich esterification reaction, following a similar procedure previously reported<sup>1</sup> and reproduced below:

2-methyl-3-nitrobenzoic acid (**b**, 1.50 g, 8.3 mmol, 1 equivalent) was dissolved in 20 ml dry dichloromethane (DCM) under a nitrogen atmosphere, with the addition of a catalytic amount of 4-dimethylaminopyridine (DMAP). Subsequently, 2.14 g (10.4 mmol, 1.25 equivalents) of

N,N'-dicyclohexylcarbodiimide (DCC) was added. The reaction mixture was stirred for 30 min, and then 1.51 g (9.1 mmol, 1.1 equivalents) of 2,3,5,6-tetrafluorophenol (**a**) was added. The resulting mixture was allowed to stir at room temperature for 24 h. Following this, the solid by-product formed (dicyclohexylurea, DCU) was removed via filtration, and the residual mixture was concentrated using a rotary evaporator. The purification was done via column chromatography, using silica gel (100-200 mesh) and ethyl acetate-hexane. The white solid product (**c**) was obtained with 70-75 % yield (1.96 g).

**<sup>1</sup>H NMR (400 MHz, CDCl<sub>3</sub>, δ in ppm)** δ = 8.32 - 8.30 (dd, 1H, Ar-H), 8.00 - 7.98 (dd, 1H, Ar-H), 7.55 - 7.51 (t, 1H, Ar-H), 7.14 - 7.05 (m, 1H, Ar-H), 2.72 (s, 3H, -CH<sub>3</sub>).

**<sup>13</sup>C {<sup>1</sup>H} NMR (100 MHz, CDCl<sub>3</sub>, δ in ppm)** δ = 161.82, 152.28, (147.46, 147.38, 147.34, 147.26, C atom bonded to F showing C-F splitting), (145.02, 144.91, 144.86, C atom bonded to F), (142.01, 141.84, 141.83, C atom bonded to F), (139.47, 139.46, 139.34, C atom bonded to F), 134.73, 134.49, 129.99, 129.34 (aromatic C in fluorinated ring), 128.28, 126.94, (104.01, 103.78, 103.56, 103.55, aromatic C in fluorinated ring), (16.23, 16.20, -CH<sub>3</sub> on central core).

#### Synthesis of compound (d) 2,3,5,6-tetrafluorophenyl 3-amino-2-methylbenzoate

Compound (**d**) was synthesized through the reduction of the nitro group present in compound (**c**) via a hydrogenation reaction. 1.50 g (4.6 mmol) of Compound (**c**) was dissolved in ethyl acetate (10 ml), and 75 mg (5 wt%) of palladium on activated charcoal catalyst was added. The reaction mixture was then stirred under a hydrogen (H<sub>2</sub>) atmosphere at room temperature. After 12 h, the catalyst was removed by filtration, and the resulting residue was concentrated via solvent evaporation, yielding product (**d**) as a brownish solid with an 80-85% yield (1.14 g).

**<sup>1</sup>H NMR (400 MHz, CDCl<sub>3</sub>, δ in ppm)** δ = 7.56 - 7.53 (dd, 1H, Ar-H), 7.17 - 7.13 (t, 1H, Ar-H), 7.07 - 6.98 (m, 1H, Ar-H), 6.94 - 6.92 (dd, 1H, Ar-H), 3.84 (br s, 2H, -NH<sub>2</sub>), 2.42 (s, 3H, -CH<sub>3</sub>).

**<sup>13</sup>C {<sup>1</sup>H} NMR (100 MHz, CDCl<sub>3</sub>, δ in ppm)** δ = 163.89, (147.47, 147.36, 147.31, 147.19, C atom bonded to F showing C-F splitting), 145.91, 144.89 (C atom bonded to F), (142.20, 142.02, C atom bonded to F), (139.70, 139.58, C atom bonded to F), 130.03 (aromatic C in fluorinated ring), 127.91, 126.44, 124.53, 121.51, 119.87, (103.34, 103.11, 102.88, aromatic C in fluorinated ring), (13.86, 13.83, -CH<sub>3</sub> on central core).

#### Synthesis of compound (h.n) 4-formyl-3-hydroxyphenyl 4-(n-alkoxy)benzoate

The general procedure for synthesizing intermediate compound (**h.n**) is similar as reported earlier<sup>1</sup> and briefly discussed below:

4-hydroxybenzoic acid (**e**, 1 g, 7.2 mmol, 1 equivalent) was mixed with an ethanolic solution (20 ml) of 2.5 equivalents KOH (1.02 g, 18 mmol) under refluxing conditions. To the mixture, 1.2 equivalent (8.6 mmol) of n-alkyl bromide (C<sub>n</sub>H<sub>2n+1</sub>Br) were added (for n : 8, 12, 14, 16, 18) and allowed to reflux for 6 h. Further, 10 % aqueous KOH solution (5-10 ml) was added, and

the mixture was refluxed for 3 h to hydrolyze any formed esters. The reaction mixture was then neutralized by pouring in acid water, resulting in the appearance of a white solid product upon stirring. The product was collected via filtration and washed with water, yielding 75-80% of the desired compounds (**f.n**).

The obtained 4-alkoxybenzoic acid (**f.n**) was then dissolved (1.0 g, 1 equivalent) in 10 ml dry Tetrahydrofuran (THF) under nitrogen atmosphere followed by the addition of a catalytic amount of DMAP. Further, 1.2 equivalents of DCC were added to it followed by the addition of 1 equivalent (with respect to **f.n**) of 2,4-dihydroxybenzaldehyde (**g**). The reaction mixture was stirred for 24 hours at room temperature. The by-product DCU precipitated out and was removed by filtration. The filtrate was concentrated by evaporating the solvent and the crude product was obtained which was purified by column chromatography using silica gel and hexane-ethyl acetate as eluent (60-65 % yield).

The  $^1\text{H}$  and  $^{13}\text{C}$  NMR data for one of the intermediate homologue (representative compound **h.12**) is reported earlier<sup>1</sup>.

#### **Synthesis of final compound (F4-na) 2,3,5,6-tetrafluorophenyl (E)-3-((2-hydroxy-4-((4-(alkyloxy)benzoyl)oxy)benzylidene)amino)-2-methylbenzoate**

The aldehyde **h.n** (250 mg, 1 equivalent) was dissolved in absolute ethanol (10 ml) containing a few drops of glacial acetic acid. Further, 1 equivalent of amine **d** (with respect to **h.n**) was added to the reaction mixture, which was then refluxed for 4 h. Upon cooling, a yellow solid product was obtained, which was isolated by filtration and washed with ethanol, yielding 80-85% of the final product.

## Compound F4-8a

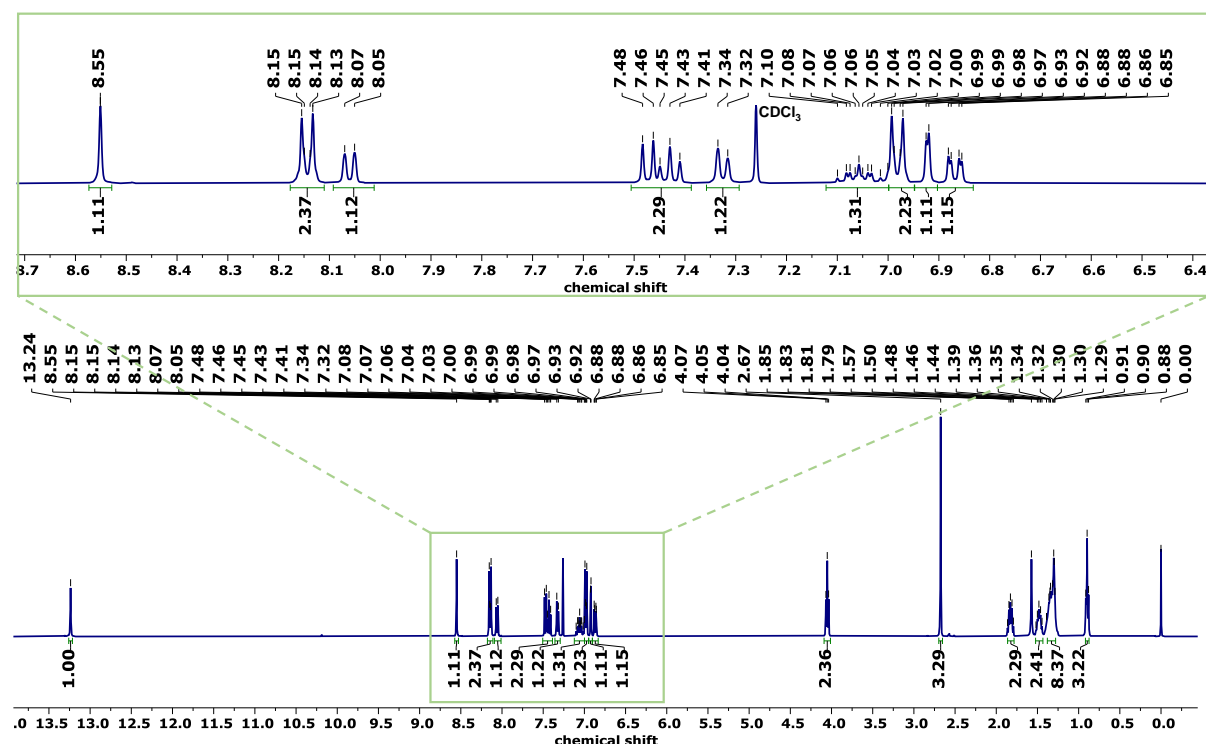

Fig. S1  $^1\text{H}$  NMR Spectra of F4-8a.

$^1\text{H}$  NMR (400 MHz,  $\text{CDCl}_3$ ,  $\delta$  in ppm)  $\delta$  = 13.24 (s, 1H, -OH), 8.55 (s, 1H, -CH=N-), 8.15 - 8.13 (m, 2H, Ar-H), 8.06 (d,  $J$  = 7.8 Hz, 1H, Ar-H), 7.48 - 7.41 (m, 2H, Ar-H), 7.34 - 7.32 (m, 1H, Ar-H), 7.10 - 7.02 (m, 1H, Ar-H), 7.00 - 6.97 (m, 2H, Ar-H), 6.92 (d,  $J$  = 2.2 Hz, 1H, Ar-H), 6.88 - 6.85 (m, 1H, Ar-H), 4.05 (t, 2H, -O-CH<sub>2</sub>-), 2.67 (s, 3H, -CH<sub>3</sub> of core), 1.85 - 1.79 (m, 2H), 1.50 - 1.44 (m, 2H), 1.39 - 1.29 (m, 8H), 0.90 (t, 3H).

$^{13}\text{C}$   $\{^1\text{H}\}$  NMR (100 MHz,  $\text{CDCl}_3$ ,  $\delta$  in ppm)  $\delta$  = 164.35, 163.77, 163.37, 163.03, 162.55, 155.35, 149.58, 147.38, 145.77, 135.17, 133.45, 132.43, 129.35, 128.30, 126.94, 123.67, 121.08, 117.03, 114.39, 113.46, 110.78, 103.34, 68.39, 31.82, 29.34, 29.24, 29.10, 26.00, 22.68, 15.44, 14.13.

FT-IR ( $\text{cm}^{-1}$ ): 2918, 2852 (C-H stretching of alkyl groups), 1728 (C=O stretching of ester), 2354, 1610 (C=N of imine linkage), 1526, 1264, 1169, 1067, 753.

UV-visible absorption peaks (nm): 278, 339

## Compound F4-12a

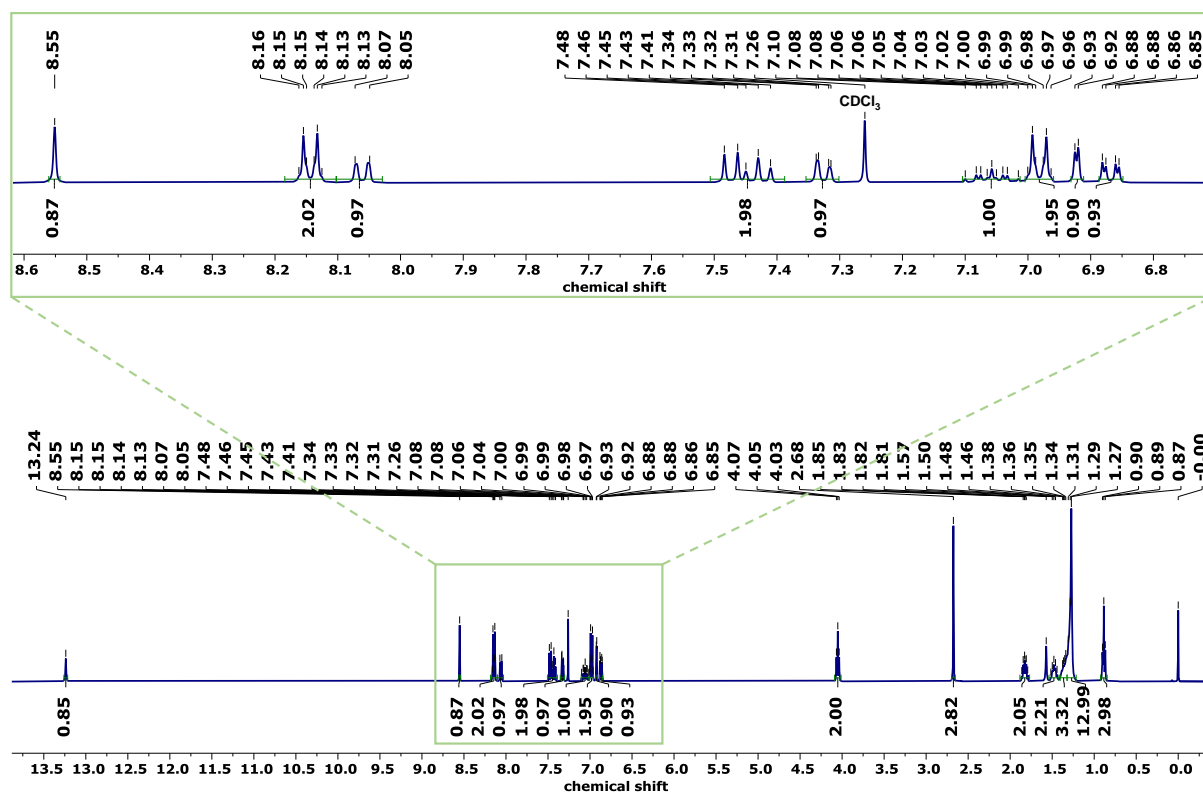

Fig. S2  $^1\text{H}$  NMR Spectra of F4-12a.

$^1\text{H}$  NMR (400 MHz,  $\text{CDCl}_3$ ,  $\delta$  in ppm)  $\delta$  = 13.24 (s, 1H, -OH), 8.55 (s, 1H, -CH=N-), 8.16 - 8.13 (m, 2H, Ar-H), 8.06 (d,  $J$  = 7.8 Hz, 1H, Ar-H), 7.48 - 7.41 (m, 2H, Ar-H), 7.34 - 7.31 (m, 1H, Ar-H), 7.10 - 7.02 (m, 1H, Ar-H), 7.00 - 6.96 (m, 2H, Ar-H), 6.92 (d,  $J$  = 2.2 Hz, 1H, Ar-H), 6.88 - 6.85 (m, 1H, Ar-H), 4.05 (t, 2H, -O-CH<sub>2</sub>-), 2.68 (s, 3H, -CH<sub>3</sub> of core), 1.85 - 1.81 (m, 2H), 1.50 - 1.46 (m, 2H), 1.38 - 1.34 (m, 3H), 1.31 - 1.27 (m, 13H), 0.89 (t, 3H).



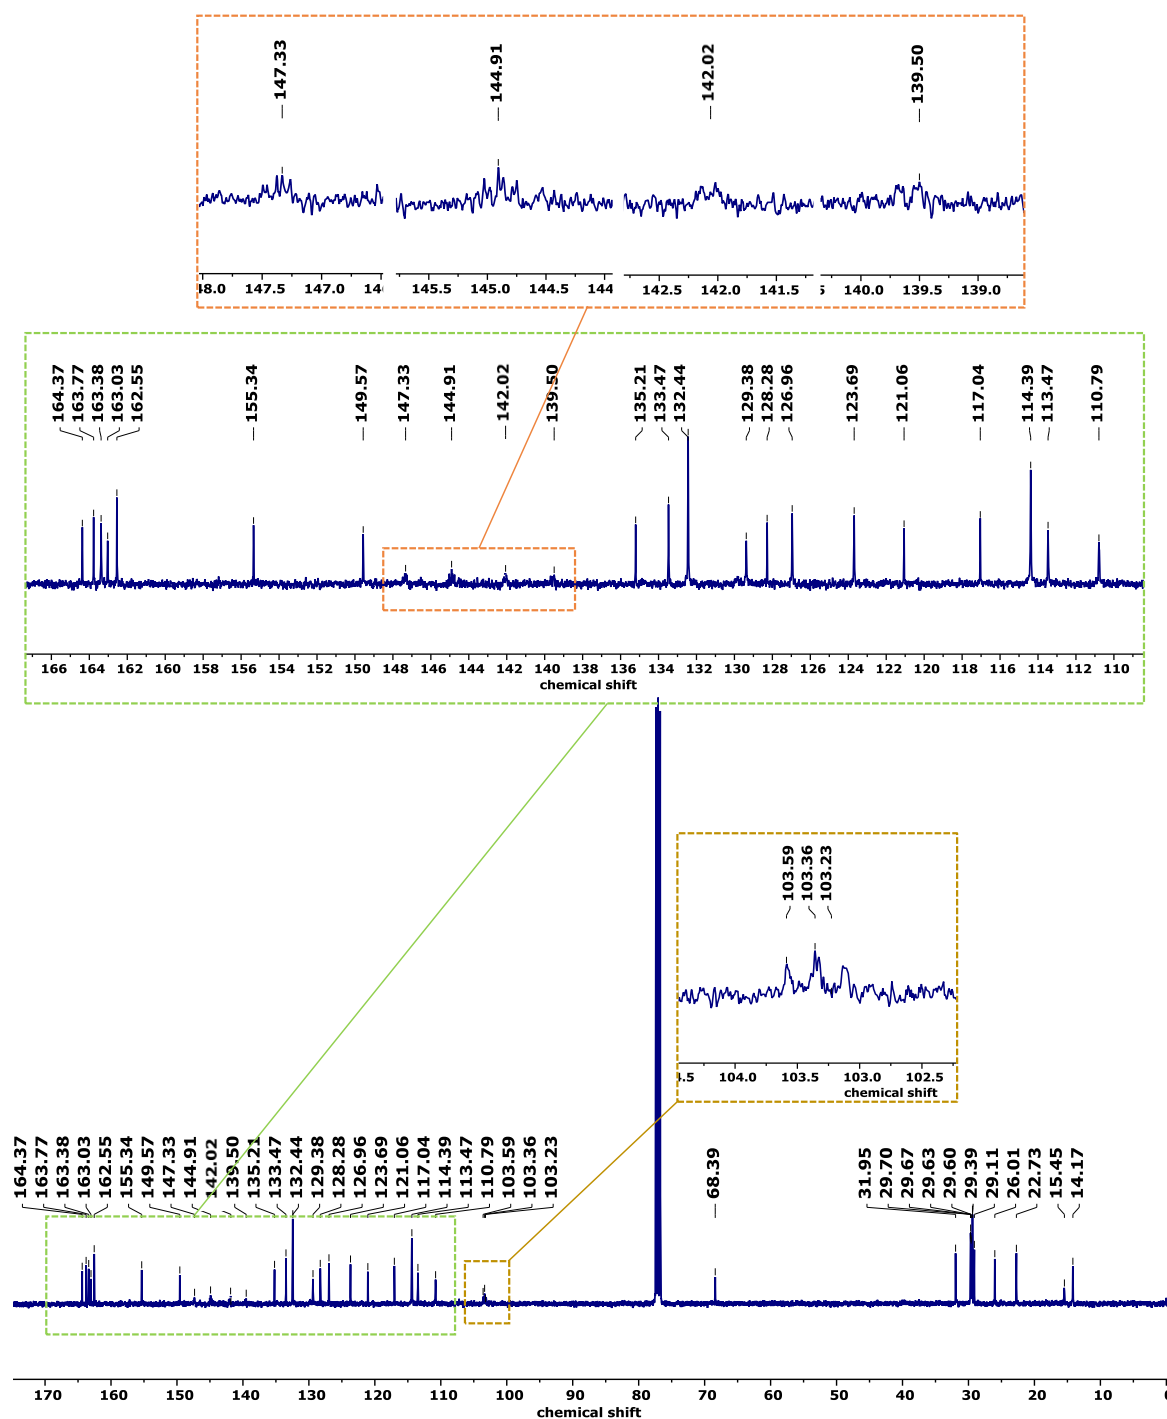

**Fig. S3**  $^{13}\text{C}$   $\{^1\text{H}\}$  NMR Spectra of **F4-12a** (representative compound).

$^{13}\text{C}$   $\{^1\text{H}\}$  NMR (100 MHz,  $\text{CDCl}_3$ ,  $\delta$  in ppm)  $\delta$  = 164.37, 163.77, 163.38, 163.03, 162.55, 155.34, 149.57, (147.33, 144.91, 142.02, 139.50; C atoms bonded to F), 135.21, 133.47, 132.44, 129.38, 128.28, 126.96, 123.69, 121.06, 117.04, 114.39, 113.47, 110.79, (103.59, 103.36, 103.23; aromatic C in fluorinated ring), 68.39, 31.95, 29.70, 29.67, 29.63, 29.60, 29.39, 29.11, 26.01, 22.73, 15.45, 14.17.

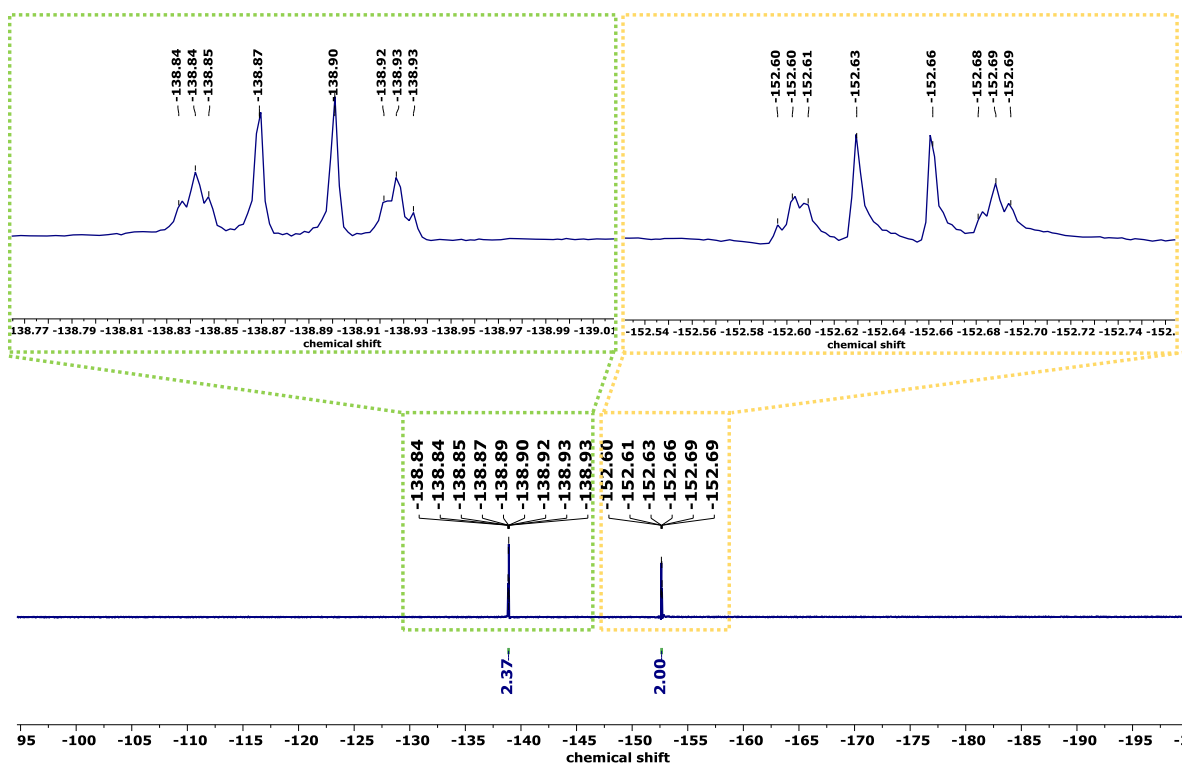

**Fig. S4**  $^{19}\text{F}\{^1\text{H}\}$  NMR Spectra of **F4-12a** (representative compound).

$^{19}\text{F}\{^1\text{H}\}$  NMR (377 MHz,  $\text{CDCl}_3$ ,  $\delta$  in ppm) -138.84 – -138.93 (m), -152.60 – -152.69 (m)

**FT-IR ( $\text{cm}^{-1}$ ):** 2919, 2852 (C-H stretching of alkyl groups), 1727 (C=O stretching of ester), 2354, 1610 (C=N of imine linkage), 1525, 1264, 1166, 1067, 752.

**UV-visible absorption peaks (nm):** 279, 339

## Compound F4-14a

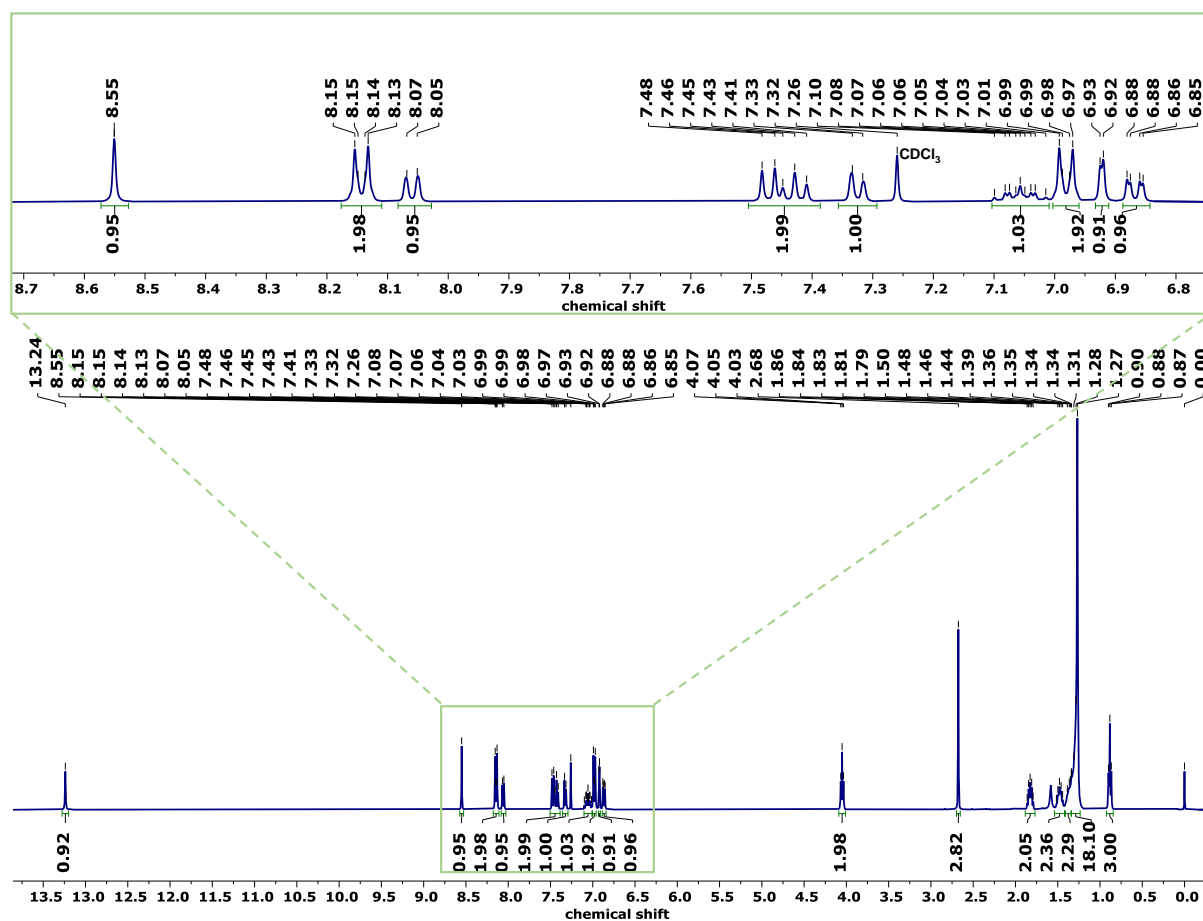

Fig. S5  $^1\text{H}$  NMR Spectra of F4-14a.

$^1\text{H}$  NMR (400 MHz,  $\text{CDCl}_3$ ,  $\delta$  in ppm)  $\delta$  = 13.24 (s, 1H, -OH), 8.55 (s, 1H, -CH=N-), 8.15 - 8.13 (m, 2H, Ar-H), 8.06 (d,  $J$  = 7.8 Hz, 1H, Ar-H), 7.48 - 7.41 (m, 2H, Ar-H), 7.33 - 7.32 (m, 1H, Ar-H), 7.10 - 7.01 (m, 1H, Ar-H), 6.99 - 6.97 (m, 2H, Ar-H), 6.92 (d,  $J$  = 2.2 Hz, 1H, Ar-H), 6.88 - 6.85 (m, 1H, Ar-H), 4.05 (t, 2H, -O-CH<sub>2</sub>-), 2.68 (s, 3H, -CH<sub>3</sub> of Core), 1.86 - 1.79 (m, 2H), 1.50 - 1.44 (m, 2H), 1.39 - 1.34 (m, 2H), 1.34 - 1.27 (m, 18H), 0.88 (t, 3H).

$^{13}\text{C}$   $\{^1\text{H}\}$  NMR (100 MHz,  $\text{CDCl}_3$ ,  $\delta$  in ppm)  $\delta$  = 164.35, 163.77, 163.37, 163.03, 162.55, 155.35, 149.58, 144.86, 135.17, 133.45, 132.43, 129.35, 128.30, 126.94, 123.67, 121.07, 117.03, 114.39, 113.45, 110.78, 103.32, 68.39, 31.95, 29.71, 29.68, 29.61, 29.58, 29.38, 29.10, 25.99, 22.72, 15.47, 14.15.

FT-IR ( $\text{cm}^{-1}$ ): 2916, 2851 (C-H stretching of alkyl groups), 1727 (C=O stretching of ester), 2353, 1611 (C=N of imine linkage), 1526, 1263, 1169, 1067, 752.

UV-visible absorption peaks (nm): 282, 339

## Compound F4-16a

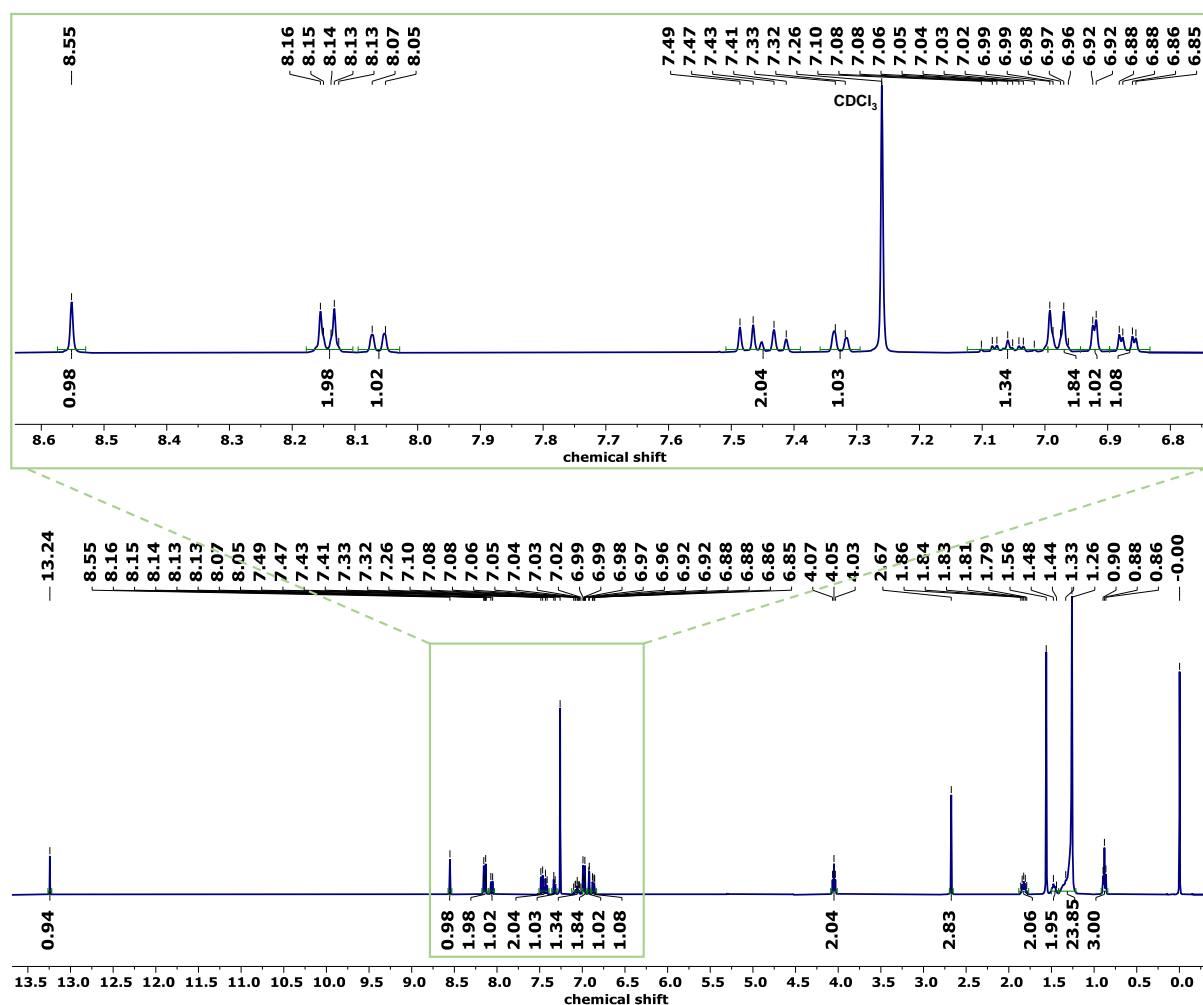

Fig. S6  $^1\text{H}$  NMR Spectra of F4-16a.

$^1\text{H}$  NMR (400 MHz,  $\text{CDCl}_3$ ,  $\delta$  in ppm)  $\delta$  = 13.24 (s, 1H, -OH), 8.55 (s, 1H, -CH=N-), 8.16 - 8.13 (m, 2H, Ar-H), 8.06 (d,  $J$  = 7.8 Hz, 1H, Ar-H), 7.49 - 7.41 (m, 2H, Ar-H), 7.33 - 7.32 (m, 1H, Ar-H), 7.10 - 7.02 (m, 1H, Ar-H), 6.99 - 6.96 (m, 2H, Ar-H), 6.92 (d,  $J$  = 2.2 Hz, 1H, Ar-H), 6.88 - 6.85 (m, 1H, Ar-H), 4.05 (t, 2H, -O-CH<sub>2</sub>-), 2.67 (s, 3H, -CH<sub>3</sub> of Core), 1.86 - 1.79 (m, 2H), 1.48 - 1.44 (m, 2H), 1.33 - 1.26 (m, 24H), 0.88 (t, 3H).

$^{13}\text{C}$   $\{^1\text{H}\}$  NMR (100 MHz,  $\text{CDCl}_3$ ,  $\delta$  in ppm)  $\delta$  = 164.36, 163.77, 163.37, 163.03, 162.54, 155.34, 149.56, 147.33, 135.19, 133.46, 132.43, 129.37, 128.28, 126.95, 123.68, 121.06, 117.04, 114.38, 113.46, 110.78, 103.34, 68.39, 31.96, 29.73, 29.69, 29.62, 29.59, 29.40, 29.11, 26.00, 22.73, 15.45, 14.16.

FT-IR ( $\text{cm}^{-1}$ ): 2920, 2849 (C-H stretching of alkyl groups), 1728 (C=O stretching of ester), 2354, 1610 (C=N of imine linkage), 1526, 1262, 1169, 1067, 754.

UV-visible absorption peaks (nm): 278, 339

## Compound F4-18a

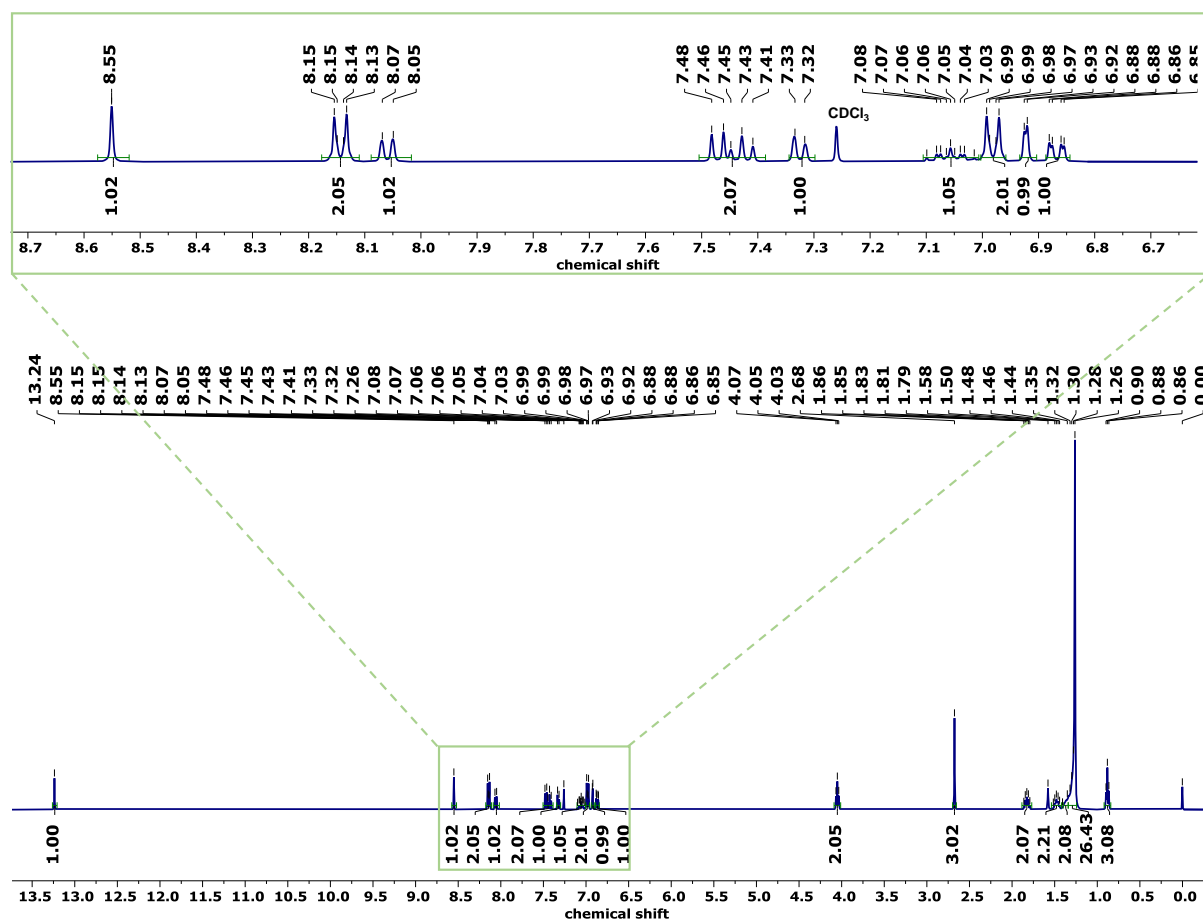

Fig. S7  $^1\text{H}$  NMR Spectra of F4-18a.

$^1\text{H}$  NMR (400 MHz,  $\text{CDCl}_3$ ,  $\delta$  in ppm)  $\delta$  = 13.24 (s, 1H, -OH), 8.55 (s, 1H, -CH=N-), 8.15 - 8.13 (m, 2H, Ar-H), 8.06 (d,  $J$  = 7.8 Hz, 1H, Ar-H), 7.48 - 7.41 (m, 2H, Ar-H), 7.33 - 7.32 (m, 1H, Ar-H), 7.08 - 7.03 (m, 1H, Ar-H), 6.99 - 6.97 (m, 2H, Ar-H), 6.92 (d,  $J$  = 2.2 Hz, 1H, Ar-H), 6.88 - 6.85 (m, 1H, Ar-H), 4.05 (t, 2H, -O-CH<sub>2</sub>), 2.68 (s, 3H, -CH<sub>3</sub> of Core), 1.86 - 1.79 (m, 2H), 1.50 - 1.44 (m, 2H), 1.35 - 1.32 (m, 2H), 1.30 - 1.26 (m, 26H), 0.88 (t, 3H).

$^{13}\text{C}$   $\{^1\text{H}\}$  NMR (100 MHz,  $\text{CDCl}_3$ ,  $\delta$  in ppm)  $\delta$  = 164.35, 163.77, 163.37, 163.02, 162.55, 155.36, 149.58, 135.17, 133.45, 132.42, 129.35, 128.30, 126.94, 123.66, 121.08, 117.03, 114.38, 113.46, 110.78, 103.33, 68.39, 31.95, 29.72, 29.68, 29.61, 29.58, 29.39, 29.10, 26.00, 22.72, 15.44, 14.15.

FT-IR ( $\text{cm}^{-1}$ ): 2918, 2851 (C-H stretching of alkyl groups), 1728 (C=O stretching of ester), 2354, 1610 (C=N of imine linkage), 1524, 1262, 1169, 1067, 753.

UV-visible absorption peaks (nm): 278, 339

### 3. Polarized Optical Microscopy

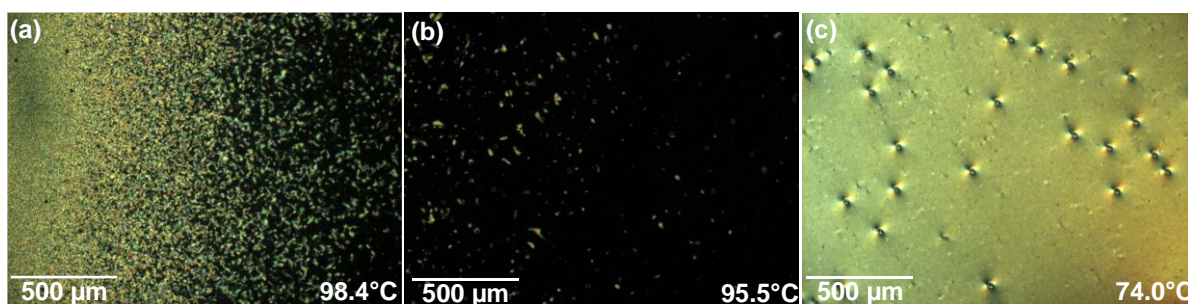

**Fig. S8** POM textures (under crossed polarizers) for **F4-8a** (a-c) showing the transition from N to SmC phase in 18.3  $\mu\text{m}$  homeotropic cell, observed at a cooling rate of  $10\text{ }^{\circ}\text{C min}^{-1}$ .

**F4-8a**, on a standard glass slide, exhibits an isotropic to N phase transition at  $108\text{ }^{\circ}\text{C}$ , followed by a transition to a homeotropic dark texture. Subsequently, the SmC phase emerges at  $78.4\text{ }^{\circ}\text{C}$ , followed by crystallization at  $69.2\text{ }^{\circ}\text{C}$ . In a homeotropic cell with a thickness of  $18.3\text{ }\mu\text{m}$ , the isotropic to N transition is observed at  $101.5\text{ }^{\circ}\text{C}$ , followed by a homeotropic dark texture. At  $81.9\text{ }^{\circ}\text{C}$ , the SmC phase emerges, with crystallization occurring around  $68.5\text{ }^{\circ}\text{C}$  (Fig. S8 (a-c)).

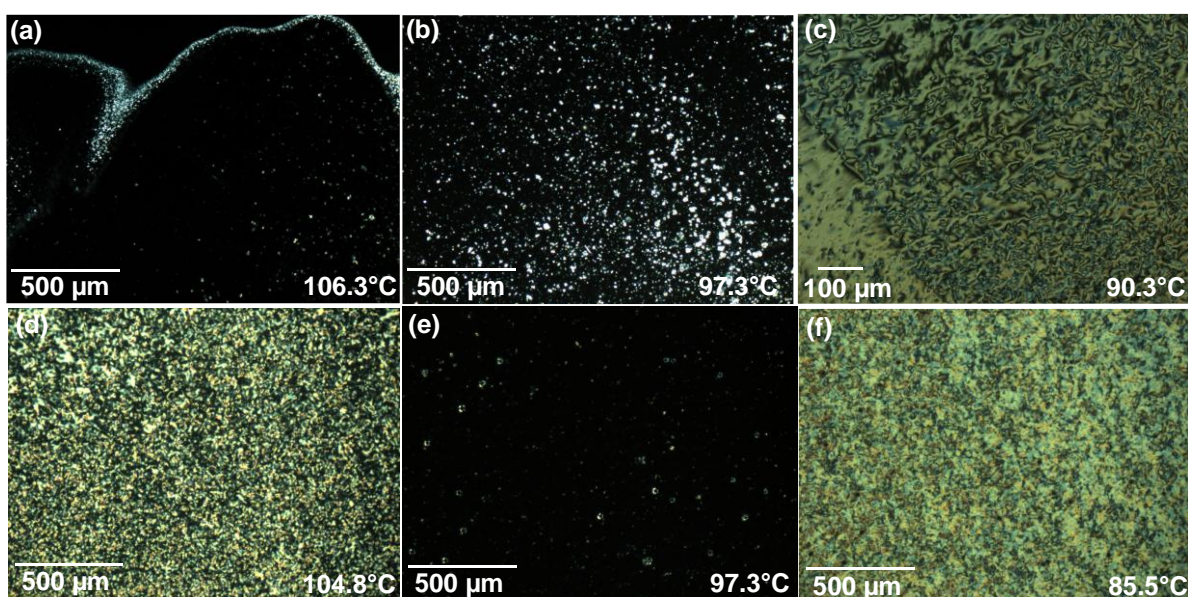

**Fig. S9** POM textures (under crossed polarizers) for **F4-12a** (a-c) on a glass slide with a coverslip (cooling rate  $5\text{ }^{\circ}\text{C min}^{-1}$ ); (d-f) in  $18.3\text{ }\mu\text{m}$  homeotropic cell, observed at a cooling rate of  $10\text{ }^{\circ}\text{C min}^{-1}$ .

On a standard glass slide, **F4-12a** exhibits an isotropic to N transition around  $106.2\text{ }^{\circ}\text{C}$ , followed by a transition to a homeotropic-like orientation. Subsequently, another phase transition (to SmC phase) occurs at  $96.3\text{ }^{\circ}\text{C}$ , with crystallization observed at  $61\text{ }^{\circ}\text{C}$ . In a homeotropic cell with a thickness of  $18.3\text{ }\mu\text{m}$ , the isotropic to N transition is observed at  $104.8\text{ }^{\circ}\text{C}$ , followed by a homeotropic dark texture. At  $94.9\text{ }^{\circ}\text{C}$ , the SmC phase emerges, with crystallization occurring around  $57.7\text{ }^{\circ}\text{C}$  (Fig. S9). POM textures under planar alignment conditions are provided in **Fig. S18**.



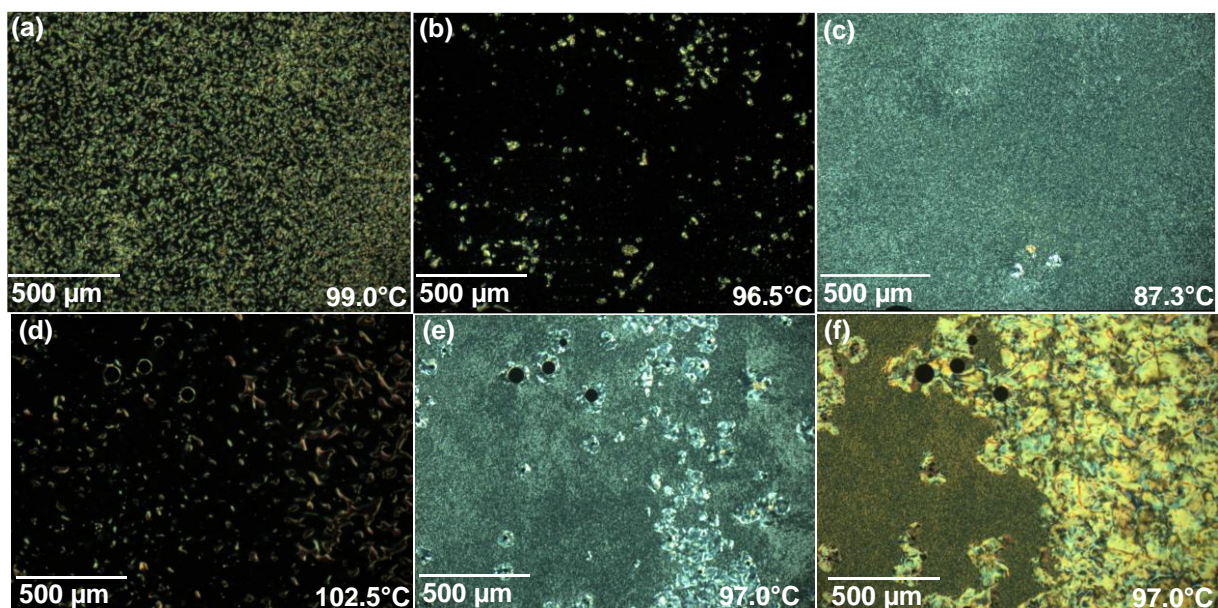

**Fig. S10** POM textures (under crossed polarizers) for **F4-14a** (a-c) on a glass slide with a coverslip (cooling rate  $5\text{ }^{\circ}\text{C min}^{-1}$ ); (d-f) in  $18.3\text{ }\mu\text{m}$  homeotropic cell, observed at a cooling rate of  $10\text{ }^{\circ}\text{C min}^{-1}$ .

The compound **F4-14a**, when observed on a glass slide, exhibits birefringence upon cooling from isotropic state at  $100.3\text{ }^{\circ}\text{C}$  (to N phase), which transforms into a homeotropic-like dark texture. Some regions show changes in birefringent spots near  $98\text{ }^{\circ}\text{C}$ . At  $90.3\text{ }^{\circ}\text{C}$ , a transition to the SmC phase occurs, and the sample crystallizes at  $63.5\text{ }^{\circ}\text{C}$ . In a homeotropic cell with a thickness of  $18.3\text{ }\mu\text{m}$ , the N phase appears at  $103.5\text{ }^{\circ}\text{C}$ , gradually transitioning to a homeotropic-like texture, and then displaying SmC at  $98\text{ }^{\circ}\text{C}$  (Fig. S10). POM textures under planar alignment conditions are provided in **Fig. S19**.

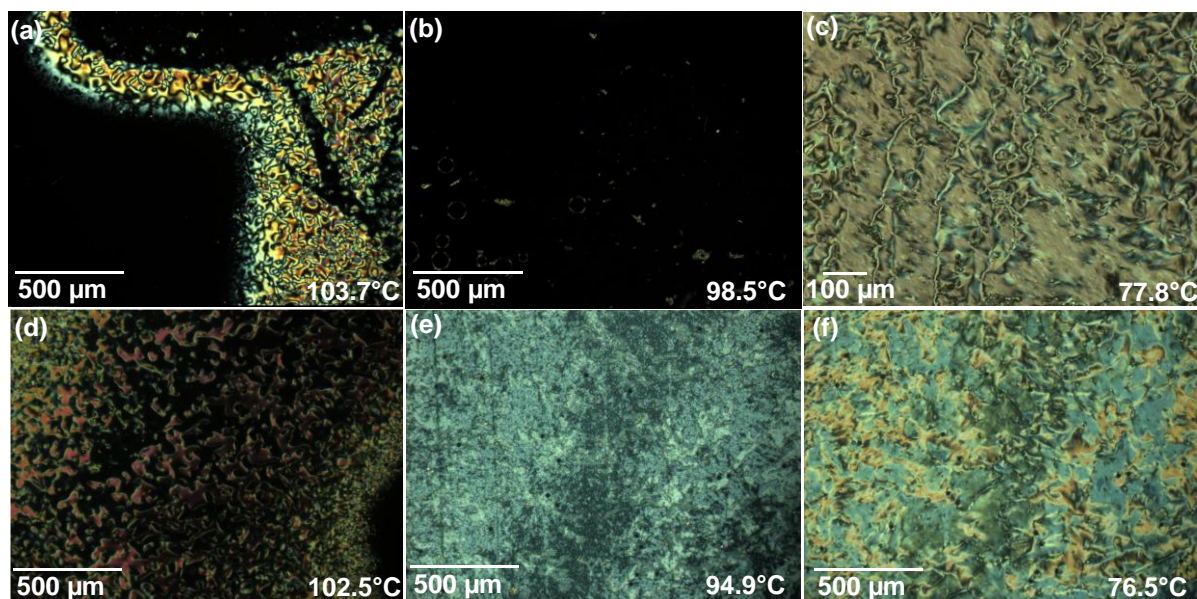

**Fig. S11** POM textures (under crossed polarizers) for **F4-16a** (a-c) on a glass slide with a



coverslip (cooling rate 5 °C min<sup>-1</sup>); (d-f) in 18.3 µm homeotropic cell, observed at a cooling rate of 10 °C min<sup>-1</sup>.

For the **F4-16a** sample, transitions were observed under various conditions. On a glass slide, the N phase transition occurred at 103.7 °C (became dark on cooling), followed by the SmC phase transition at 97.9 °C, and crystallization at 71.9 °C. In a homeotropic cell with an 18.3 µm thickness, the transitions occurred as follows: 103.4 °C for the Iso-N, 97.4 °C for the N-SmC phase, and 68.6 °C for crystallization (Fig. S11).

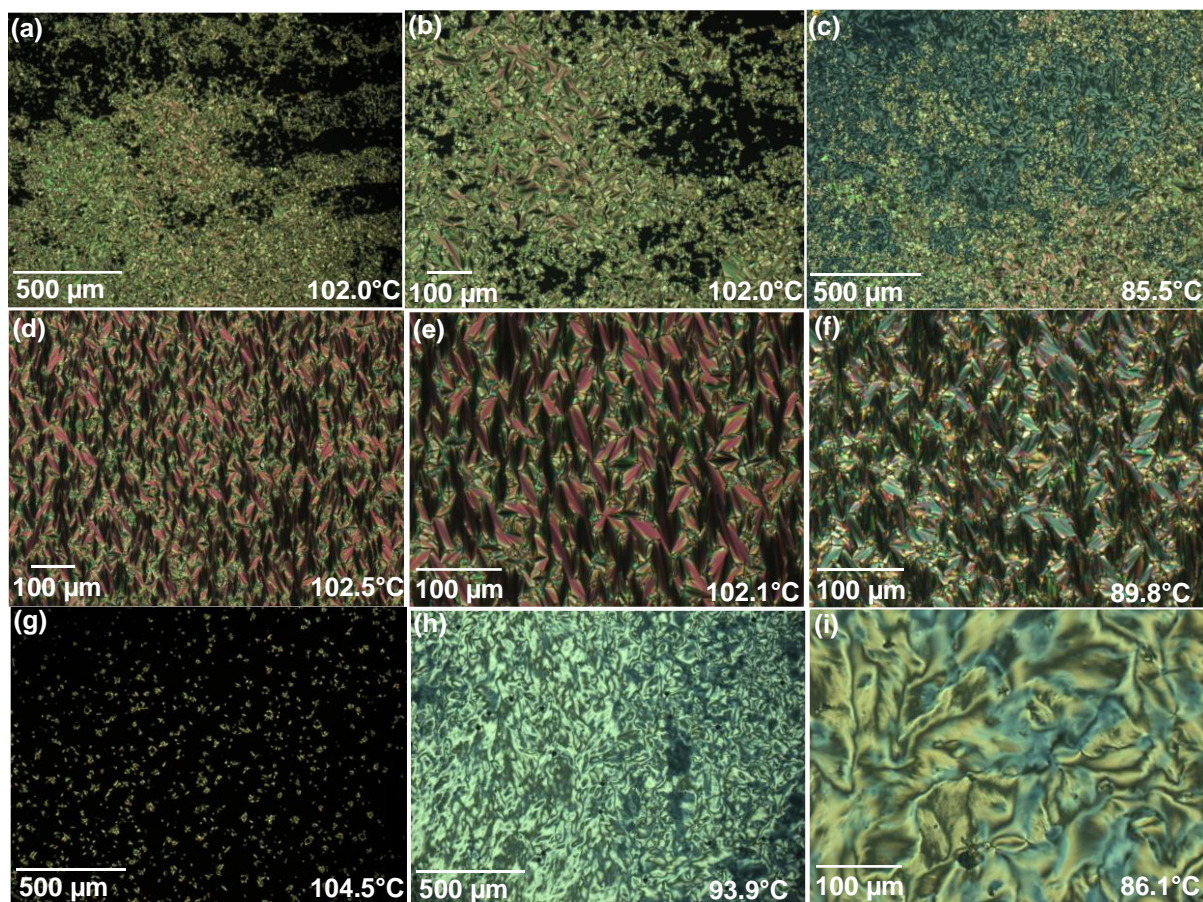

**Fig. S12** POM textures (under crossed polarizers) for **F4-18a** (a-c) on a glass slide with a coverslip (cooling rate 5 °C min<sup>-1</sup>); (d-f) in 7.7 µm planar cell and (g-i) in 18.3 µm homeotropic cell, observed at a cooling rate of 10 °C min<sup>-1</sup>.

For the **F4-18a** sample, as observed on a glass slide, the LC phase forms at 104.8 °C, displaying focal conic textures with some homeotropic regions. Upon further cooling, both focal conic textures and underlying Schlieren-like textures of SmC are observed. Crystallization occurs at 78.6 °C. However, in a planar cell with a thickness of 7.7 µm, characteristic focal conic textures appear at 105.4 °C. In a homeotropic cell with a thickness of 18.3 µm, transient nematic-like textures appear at 104.5 °C, which then convert to Schlieren textures of the SmC phase at 98.6 °C before crystallizing at 76.5 °C (Fig. S12).



## 4. Differential Scanning Calorimetry

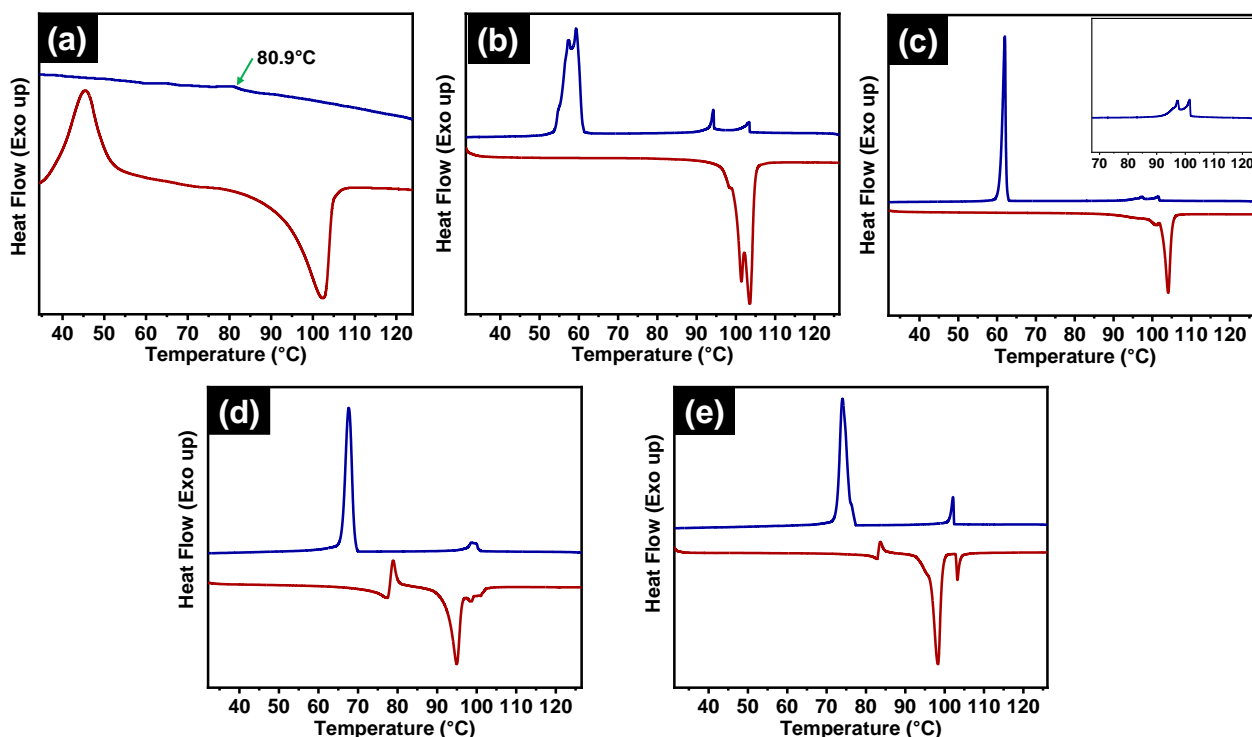

**Fig. S13** DSC thermograms obtained for **F4-na** compounds (a)  $n = 8$  (b)  $n = 12$  (c)  $n = 14$  (d)  $n = 16$  (e)  $n = 18$ , at a rate of  $5\text{ }^{\circ}\text{C min}^{-1}$  (Y-axis denote exothermic peaks up, red curve represents heating and blue curve represent cooling cycle).

## 5. Small-angle/Wide-angle X-Ray Scattering

The  $d$ -spacing can be calculated using Bragg's equation:  $2d \sin\theta = n\lambda$ , where  $\theta$  is the peak position determined from intensity vs.  $2\theta$  plots (where  $2\theta$  is known as scattering angle),  $\lambda$  is the wavelength of the X-ray beam ( $\lambda = 1.542\text{ \AA}$ ), and  $n = 1$  for first-order diffraction. Additionally, the tilt angle ( $\beta$ ) relative to the layer normal can be calculated using  $\cos \beta = d/L$  where  $L$  is the molecular length of the compound, obtained from DFT calculations.

The correlation length ( $\xi$ ), representing the degree of order within the mesophases, has been calculated using  $\xi = k.2\pi/(\Delta q)$ .<sup>2</sup> Here,  $k$  is the shape factor typically valued at 0.89 or  $q$  is the scattering wave vector ( $q = 4\pi.\sin\theta/\lambda$ ) and  $\Delta q$  is the broadening in  $q$  at half the maximum intensity (FWHM). The number of correlated units is obtained by dividing the correlation length by the corresponding  $d$ -spacing ( $\xi/d$ ), which indicates how many units are aligned to reflect that correlation length.<sup>2</sup>

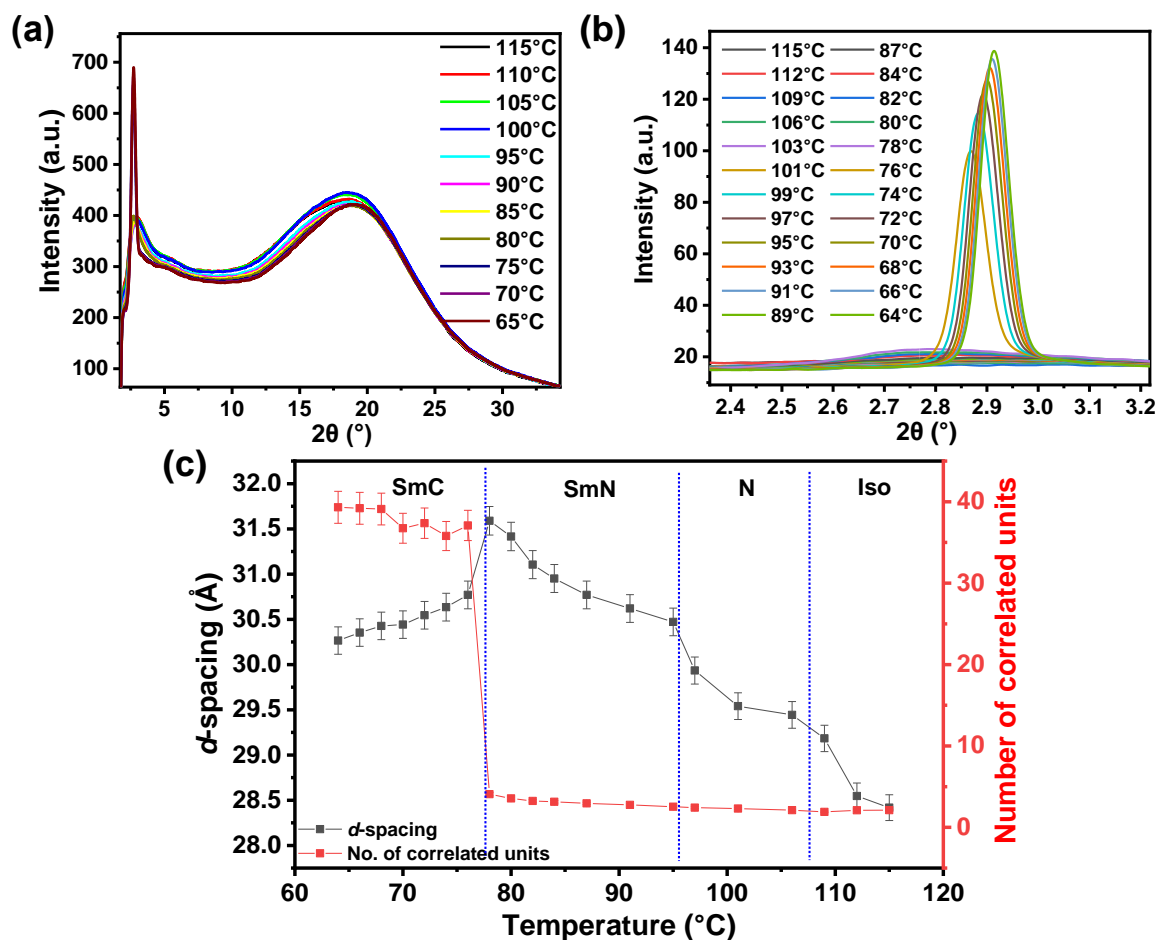

**Fig. S14** (a) WAXS data showing temperature-dependent intensity vs.  $2\theta$  (in degree) profiles for **F4-8a**, illustrating one small-angle peak and one diffuse wide-angle peak (b) Temperature variation of the small-angle peak (SAXS data) and (c) Variation of  $d$ -spacing and correlation length with respect to temperature, demonstrating different phases observed in Compound **F4-8a**.

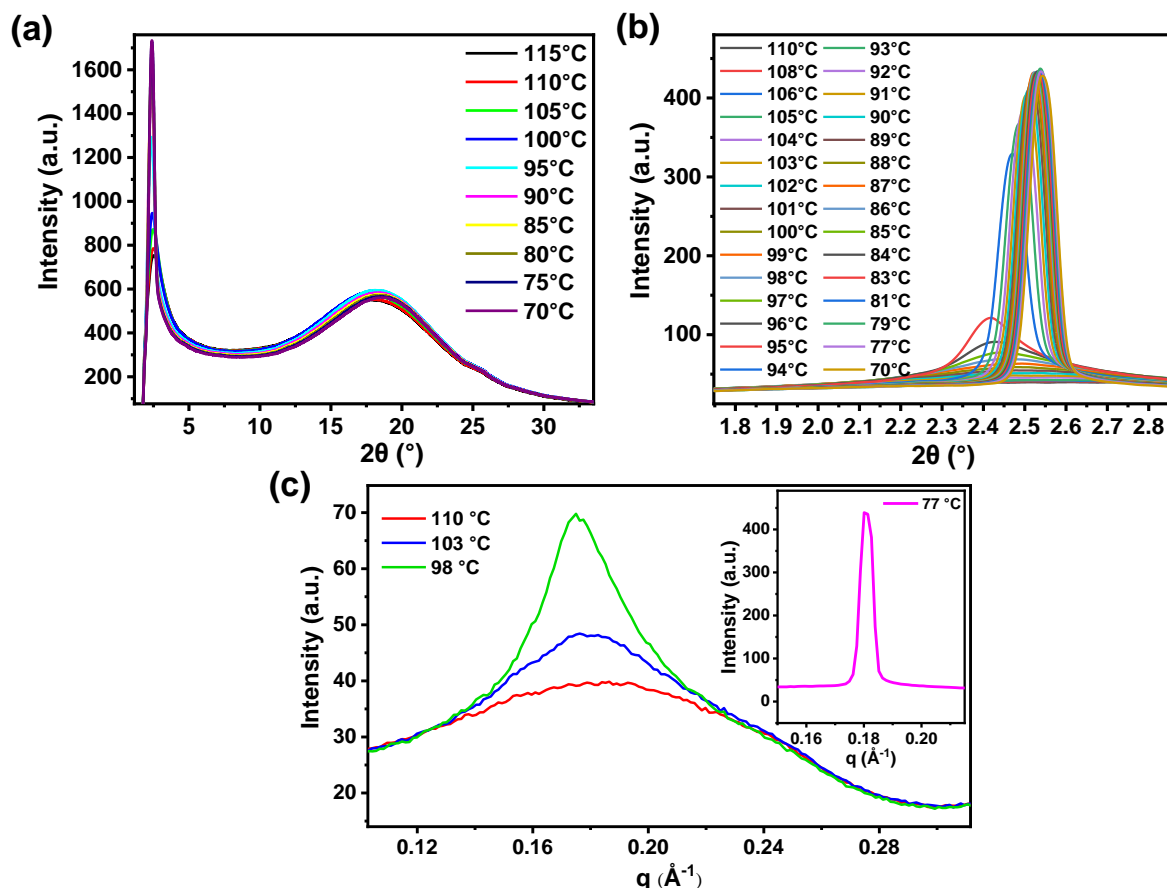

**Fig. S15** (a) WAXS data showing temperature-dependent intensity vs.  $2\theta$  (in degree) profiles for **F4-12a**, illustrating one small-angle peak and one diffuse wide-angle peak (b) Temperature variation of the small-angle peak (SAXS data) and (c) SAXS peaks expressed in  $q$ -space at different phases: Isotropic (110 °C), N (103 °C),  $N_{cyb}$  (98 °C), and SmC (77 °C) for **F4-12a**.

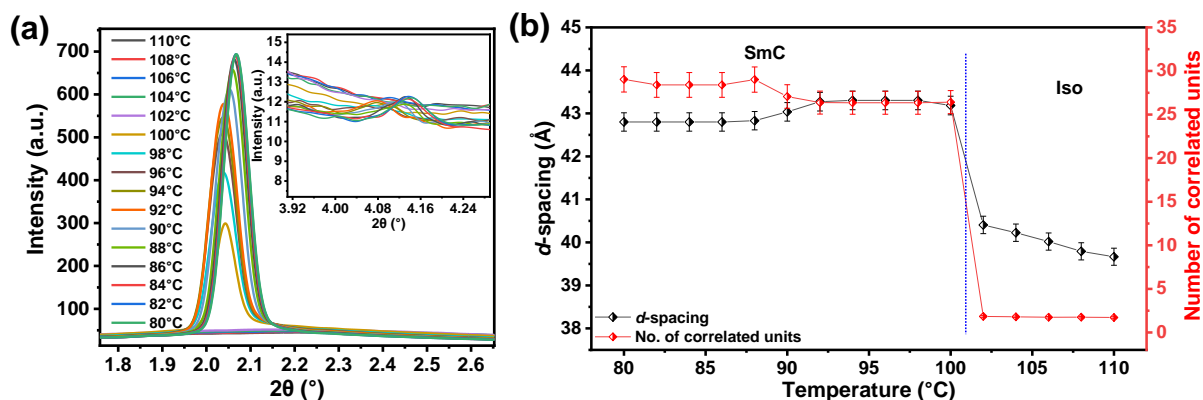

**Fig. S16** (a) Temperature variation of the small-angle peak (SAXS data) and (b) Variation of  $d$ -spacing and correlation length with respect to temperature, demonstrating different phases observed in Compound **F4-18a**.

**Table S1. Parameters calculated from SAXS/WAXS data for F4-8a (cooling cycle).**

| <b>Temperature<br/>(°C)</b> | <b><i>d</i>-spacing<br/>± 0.15<br/>(Å)</b> | <b>Correlation<br/>length<br/>(Å)</b> | <b>No. of<br/>correlated<br/>units</b> | <b>Tilt angle<br/>with layer<br/>normal (°)</b> | <b>Phase</b>     |
|-----------------------------|--------------------------------------------|---------------------------------------|----------------------------------------|-------------------------------------------------|------------------|
| 64                          | 30.26                                      | 1189.79 ± 59.49                       | 39.31 ± 1.97                           | 20.11 ± 1.01                                    | SmC              |
| 66                          | 30.35                                      | 1189.79 ± 59.49                       | 39.20 ± 1.96                           | 19.65 ± 0.98                                    | SmC              |
| 68                          | 30.43                                      | 1189.79 ± 59.49                       | 39.10 ± 1.96                           | 19.26 ± 0.98                                    | SmC              |
| 70                          | 30.44                                      | 1118.41 ± 55.92                       | 36.74 ± 1.84                           | 19.18 ± 0.96                                    | SmC              |
| 72                          | 30.54                                      | 1141.23 ± 57.06                       | 37.36 ± 1.87                           | 18.61 ± 0.93                                    | SmC              |
| 74                          | 30.64                                      | 1096.48 ± 54.82                       | 35.79 ± 1.79                           | 18.10 ± 0.91                                    | SmC              |
| 76                          | 30.77                                      | 1141.23 ± 57.06                       | 37.09 ± 1.85                           | 17.31 ± 0.87                                    | SmC              |
| 78                          | 31.59                                      | 128.85 ± 6.44                         | 4.08 ± 0.20                            |                                                 | N <sub>cyb</sub> |
| 80                          | 31.42                                      | 111.40 ± 5.57                         | 3.54 ± 0.18                            |                                                 | N <sub>cyb</sub> |
| 82                          | 31.11                                      | 100.94 ± 5.05                         | 3.24 ± 0.16                            |                                                 | N <sub>cyb</sub> |
| 84                          | 30.95                                      | 97.25 ± 4.86                          | 3.14 ± 0.16                            |                                                 | N <sub>cyb</sub> |
| 87                          | 30.77                                      | 90.63 ± 4.53                          | 2.95 ± 0.15                            |                                                 | N <sub>cyb</sub> |
| 91                          | 30.62                                      | 84.60 ± 4.23                          | 2.76 ± 0.14                            |                                                 | N <sub>cyb</sub> |
| 95                          | 30.47                                      | 77.13 ± 3.86                          | 2.53 ± 0.13                            |                                                 | N                |
| 97                          | 29.93                                      | 72.53 ± 3.63                          | 2.42 ± 0.12                            |                                                 | N                |
| 101                         | 29.54                                      | 68.28 ± 3.41                          | 2.31 ± 0.12                            |                                                 | N                |
| 106                         | 29.44                                      | 62.00 ± 3.10                          | 2.11 ± 0.11                            |                                                 | N                |
| 109                         | 29.18                                      | 55.59 ± 2.78                          | 1.91 ± 0.10                            |                                                 | Iso              |
| 112                         | 28.55                                      | 59.87 ± 3.00                          | 2.10 ± 0.11                            |                                                 | Iso              |
| 115                         | 28.42                                      | 59.87 ± 3.00                          | 2.11 ± 0.11                            |                                                 | Iso              |

**Table S2. Parameters calculated from SAXS/WAXS data for F4-12a (cooling cycle).**

| <b>Temperature<br/>(°C)</b> | <b><i>d</i>-spacing<br/>± 0.15<br/>(Å)</b> | <b>Correlation<br/>length<br/>(Å)</b> | <b>No. of<br/>correlated<br/>units</b> | <b>Tilt angle<br/>with layer<br/>normal (°)</b> | <b>Phase</b>     |
|-----------------------------|--------------------------------------------|---------------------------------------|----------------------------------------|-------------------------------------------------|------------------|
| 70                          | 34.62                                      | 1055.10 ± 52.76                       | 30.48 ± 1.52                           | 21.86 ± 1.09                                    | SmC              |
| 77                          | 34.71                                      | 1055.10 ± 52.76                       | 30.39 ± 1.52                           | 21.46 ± 1.07                                    | SmC              |
| 81                          | 34.83                                      | 1035.56 ± 51.78                       | 29.73 ± 1.49                           | 20.97 ± 1.05                                    | SmC              |
| 83                          | 34.85                                      | 1096.48 ± 54.82                       | 31.46 ± 1.57                           | 20.89 ± 1.04                                    | SmC              |
| 85                          | 34.94                                      | 1075.39 ± 53.77                       | 30.77 ± 1.54                           | 20.47 ± 1.02                                    | SmC              |
| 87                          | 35.00                                      | 1096.48 ± 54.82                       | 31.32 ± 1.57                           | 20.21 ± 1.01                                    | SmC              |
| 89                          | 35.12                                      | 1118.40 ± 55.92                       | 31.84 ± 1.59                           | 19.68 ± 0.98                                    | SmC              |
| 91                          | 35.24                                      | 1096.48 ± 54.82                       | 31.11 ± 1.56                           | 19.13 ± 0.96                                    | SmC              |
| 93                          | 35.54                                      | 1075.39 ± 53.77                       | 30.26 ± 1.51                           | 17.68 ± 0.88                                    | SmC              |
| 94                          | 35.68                                      | 1075.39 ± 53.77                       | 30.14 ± 1.51                           | 16.95 ± 0.85                                    | SmC              |
| 95                          | 36.51                                      | 372.80 ± 18.64                        | 10.21 ± 0.51                           |                                                 | N <sub>cyb</sub> |
| 96                          | 36.40                                      | 222.79 ± 11.14                        | 6.12 ± 0.31                            |                                                 | N <sub>cyb</sub> |
| 97                          | 36.07                                      | 171.01 ± 8.55                         | 4.74 ± 0.24                            |                                                 | N <sub>cyb</sub> |
| 98                          | 35.86                                      | 136.06 ± 6.80                         | 3.79 ± 0.19                            |                                                 | N <sub>cyb</sub> |
| 99                          | 35.62                                      | 116.50 ± 5.82                         | 3.27 ± 0.16                            |                                                 | N <sub>cyb</sub> |
| 100                         | 35.52                                      | 102.80 ± 5.14                         | 2.89 ± 0.14                            |                                                 | N                |
| 101                         | 35.40                                      | 91.08 ± 4.55                          | 2.57 ± 0.13                            |                                                 | N                |
| 102                         | 35.16                                      | 81.40 ± 4.07                          | 2.31 ± 0.12                            |                                                 | N                |
| 103                         | 35.08                                      | 74.86 ± 3.74                          | 2.13 ± 0.11                            |                                                 | N                |
| 104                         | 34.58                                      | 69.47 ± 3.47                          | 2.01 ± 0.10                            |                                                 | N                |
| 105                         | 34.22                                      | 60.92 ± 3.05                          | 1.78 ± 0.09                            |                                                 | Iso              |
| 106                         | 34.20                                      | 59.87 ± 2.99                          | 1.75 ± 0.09                            |                                                 | Iso              |
| 108                         | 34.11                                      | 57.77 ± 2.89                          | 1.69 ± 0.08                            |                                                 | Iso              |
| 110                         | 34.00                                      | 56.77 ± 2.84                          | 1.67 ± 0.08                            |                                                 | Iso              |

**Table S3. Parameters calculated from SAXS/WAXS data for F4-14a (cooling cycle).**

| Temperature (°C) | <i>d</i> -spacing ± 0.15 (Å) | Correlation length (Å) | No. of correlated units | Tilt angle with layer normal (°) | Phase            |
|------------------|------------------------------|------------------------|-------------------------|----------------------------------|------------------|
| 72               | 37.14                        | 1141.23 ± 57.06        | 30.73 ± 1.54            | 21.42 ± 1.07                     | SmC              |
| 76               | 37.14                        | 1141.23 ± 57.06        | 30.73 ± 1.54            | 21.42 ± 1.07                     | SmC              |
| 80               | 37.14                        | 1118.41 ± 55.92        | 30.12 ± 1.51            | 21.42 ± 1.07                     | SmC              |
| 83               | 37.14                        | 1141.23 ± 57.06        | 30.73 ± 1.54            | 21.42 ± 1.07                     | SmC              |
| 86               | 37.29                        | 1141.23 ± 57.06        | 30.61 ± 1.53            | 20.81 ± 1.04                     | SmC              |
| 89               | 37.58                        | 1165.01 ± 58.25        | 31.00 ± 1.55            | 19.60 ± 0.98                     | SmC              |
| 92               | 38.26                        | 1055.10 ± 52.76        | 27.57 ± 1.38            | 16.41 ± 0.82                     | SmC              |
| 95               | 38.31                        | 238.98 ± 11.95         | 6.24 ± 0.31             |                                  | N <sub>cyb</sub> |
| 98               | 37.29                        | 104.52 ± 5.23          | 2.80 ± 0.14             |                                  | N <sub>cyb</sub> |
| 100              | 36.19                        | 63.98 ± 3.20           | 1.77 ± 0.09             |                                  | N                |
| 102              | 36.19                        | 62.00 ± 3.10           | 1.71 ± 0.09             |                                  | N                |
| 105              | 36.19                        | 60.72 ± 3.04           | 1.68 ± 0.08             |                                  | Iso              |
| 108              | 36.19                        | 60.72 ± 3.04           | 1.68 ± 0.08             |                                  | Iso              |
| 110              | 36.19                        | 57.95 ± 2.90           | 1.60 ± 0.08             |                                  | Iso              |

**Table S4. Parameters calculated from SAXS/WAXS data for F4-16a (cooling cycle).**

| Temperature (°C) | <i>d</i> -spacing ± 0.15 (Å) | Correlation length (Å) | No. of correlated units | Tilt angle with layer normal (°) | Phase |
|------------------|------------------------------|------------------------|-------------------------|----------------------------------|-------|
| 76               | 39.69                        | 1433.86 ± 71.69        | 36.12 ± 1.81            | 20.73 ± 1.04                     | SmC   |
| 78               | 39.69                        | 1433.86 ± 71.69        | 36.12 ± 1.81            | 20.73 ± 1.04                     | SmC   |
| 80               | 39.69                        | 1433.86 ± 71.69        | 36.12 ± 1.81            | 20.73 ± 1.04                     | SmC   |
| 82               | 39.69                        | 1433.86 ± 71.69        | 36.12 ± 1.81            | 20.73 ± 1.04                     | SmC   |
| 84               | 39.69                        | 1433.86 ± 71.69        | 36.12 ± 1.81            | 20.73 ± 1.04                     | SmC   |
| 86               | 39.69                        | 1433.86 ± 71.69        | 36.12 ± 1.81            | 20.73 ± 1.04                     | SmC   |
| 88               | 39.87                        | 1363.91 ± 68.20        | 34.21 ± 1.71            | 20.05 ± 1.00                     | SmC   |
| 90               | 39.92                        | 1363.91 ± 68.20        | 34.17 ± 1.71            | 19.85 ± 0.99                     | SmC   |
| 92               | 40.02                        | 1363.91 ± 68.20        | 34.08 ± 1.70            | 19.44 ± 0.97                     | SmC   |
| 94               | 40.17                        | 1331.44 ± 66.57        | 33.14 ± 1.66            | 18.81 ± 0.94                     | SmC   |
| 96               | 40.35                        | 1433.86 ± 71.69        | 35.53 ± 1.78            | 18.04 ± 0.90                     | SmC   |
| 98               | 40.85                        | 1300.47 ± 65.02        | 31.83 ± 1.59            | 15.72 ± 0.79                     | SmC   |
| 100              | 41.07                        | 1398.02 ± 69.90        | 34.04 ± 1.70            | 14.62 ± 0.73                     | SmC   |
| 102              | 40.54                        | 173.67 ± 8.68          | 4.28 ± 0.21             |                                  | N     |
| 104              | 38.67                        | 77.45 ± 3.87           | 2.00 ± 0.10             |                                  | Iso   |
| 106              | 38.26                        | 73.29 ± 3.66           | 1.91 ± 0.10             |                                  | Iso   |
| 108              | 37.96                        | 72.81 ± 3.64           | 1.92 ± 0.10             |                                  | Iso   |

**Table S5. Parameters calculated from SAXS/WAXS data for F4-18a (cooling cycle).**

| Temperature (°C) | <i>d</i> -spacing<br>± 0.15<br>(Å) | Correlation length<br>(Å) | No. of<br>correlated units | Tilt angle<br>with layer<br>normal (°) | Phase |
|------------------|------------------------------------|---------------------------|----------------------------|----------------------------------------|-------|
| 80               | 42.80                              | 1242.67 ± 62.13           | 29.03 ± 1.45               | 17.99 ± 0.90                           | SmC   |
| 82               | 42.80                              | 1215.66 ± 60.78           | 28.40 ± 1.42               | 17.99 ± 0.90                           | SmC   |
| 84               | 42.80                              | 1215.66 ± 60.78           | 28.40 ± 1.42               | 17.99 ± 0.90                           | SmC   |
| 86               | 42.80                              | 1215.66 ± 60.78           | 28.40 ± 1.42               | 17.99 ± 0.90                           | SmC   |
| 88               | 42.83                              | 1242.67 ± 62.13           | 29.01 ± 1.4                | 17.86 ± 0.89                           | SmC   |
| 90               | 43.04                              | 1165.00 ± 58.25           | 27.07 ± 1.35               | 16.99 ± 0.86                           | SmC   |
| 92               | 43.27                              | 1141.23 ± 57.06           | 26.37 ± 1.32               | 15.93 ± 0.80                           | SmC   |
| 94               | 43.30                              | 1141.23 ± 57.06           | 26.36 ± 1.32               | 15.79 ± 0.79                           | SmC   |
| 96               | 43.30                              | 1141.23 ± 57.06           | 26.36 ± 1.32               | 15.79 ± 0.79                           | SmC   |
| 98               | 43.30                              | 1141.23 ± 57.06           | 26.36 ± 1.32               | 15.79 ± 0.79                           | SmC   |
| 100              | 43.18                              | 1141.23 ± 57.06           | 26.43 ± 1.32               | 15.79 ± 0.79                           | SmC   |
| 102              | 40.41                              | 74.46 ± 3.72              | 1.84 ± 0.09                |                                        | Iso   |
| 104              | 40.22                              | 72.25 ± 3.61              | 1.80 ± 0.09                |                                        | Iso   |
| 106              | 40.02                              | 69.73 ± 3.49              | 1.74 ± 0.09                |                                        | Iso   |
| 108              | 39.79                              | 69.73 ± 3.49              | 1.75 ± 0.09                |                                        | Iso   |
| 110              | 39.67                              | 68.03 ± 3.40              | 1.72 ± 0.09                |                                        | Iso   |

## 6. Structure-Property Relation

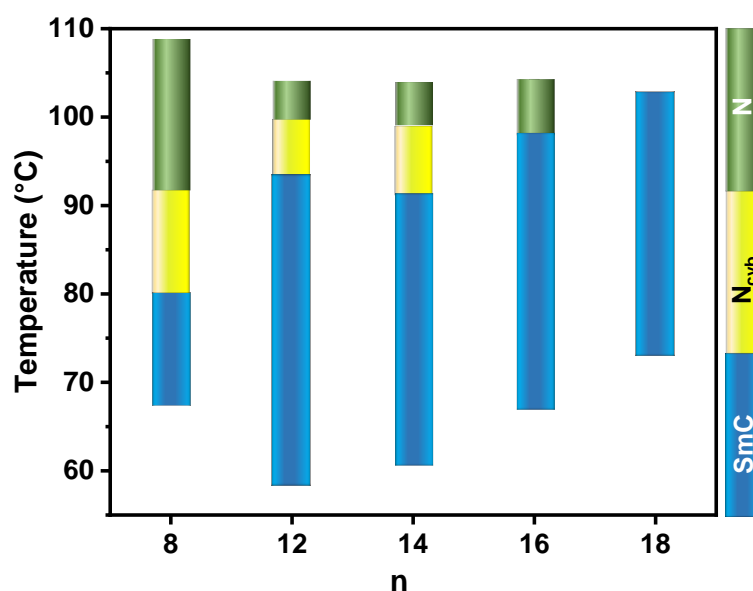

**Fig. S17** Graphical representation of phases exhibited by various homologues of the **F4-na** series of compounds.

## 7. Birefringence Measurements

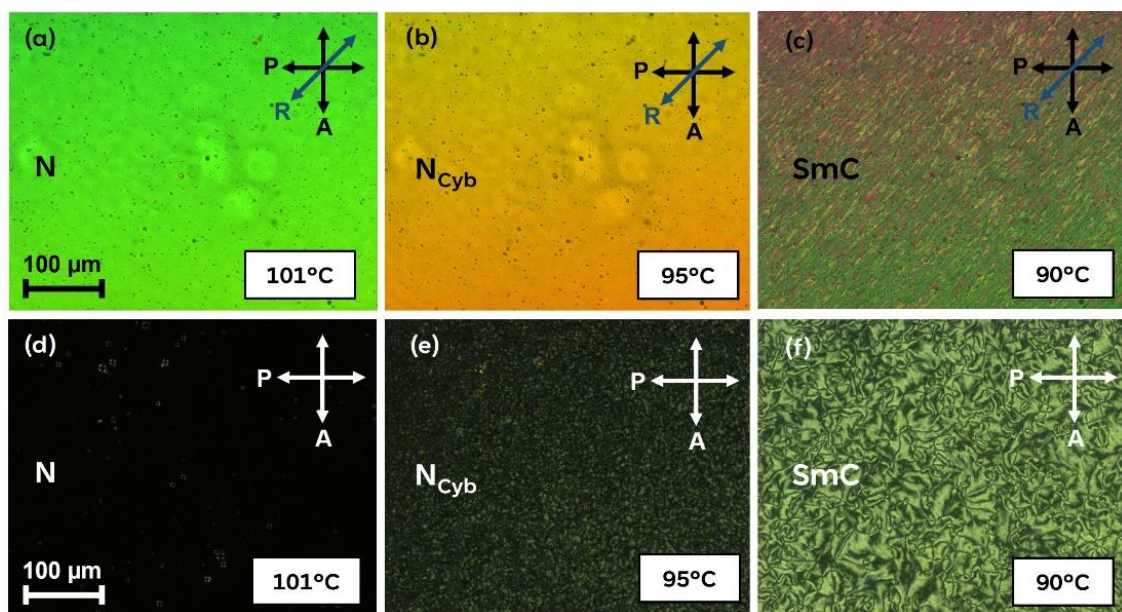

**Fig. S18** POM micrographs of **F4-12a** at different temperatures in (a-c) a planar cell (antiparallel buffing) and (d-f) a homeotropic cell with a thickness of 9  $\mu\text{m}$ . For the planar texture, the cell is positioned under crossed polarizers, with the rubbing direction (R) at 45° to both the polarizer (P) and analyzer (A).

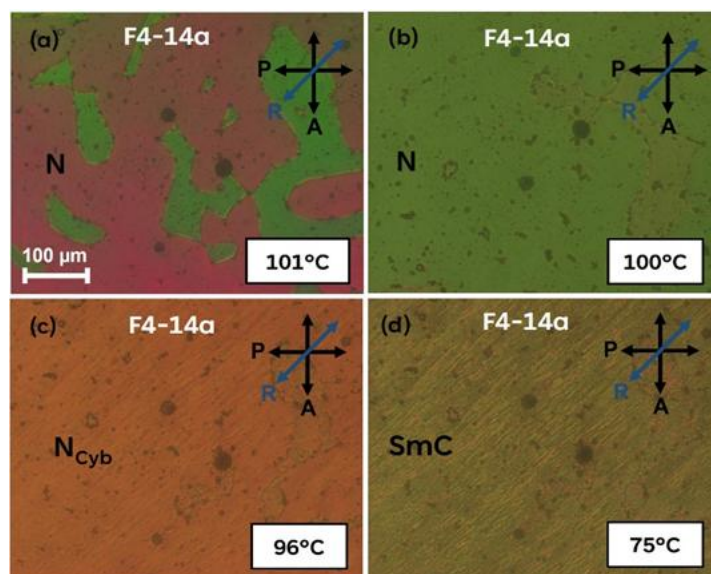

**Fig. S19** POM micrographs of **F4-14a** at different temperatures in a planar cell (antiparallel buffing) of thickness 9  $\mu\text{m}$ . The cell is kept under crossed polarizers with rubbing direction (R) at 45° with both the polarizer (P) and analyzer (A), respectively.



## 8. Dielectric Spectroscopy

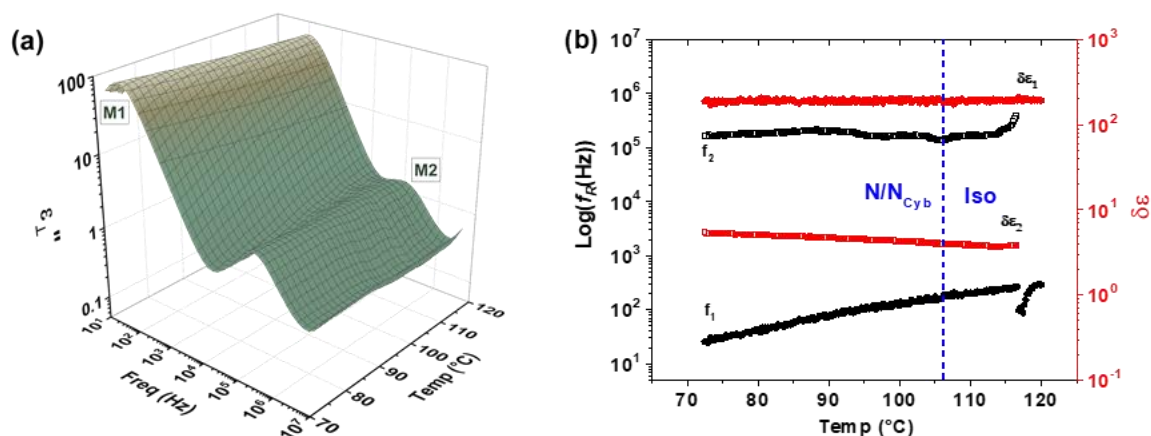

**Fig. S20** (a) Dielectric loss spectra ( $\epsilon''$ ) of **F4-8a** as a function of temperature and frequency in a planar cell (b) Temperature variation of relaxation frequencies and corresponding dielectric strength of the LC based relaxation modes present in **F4-8a**.

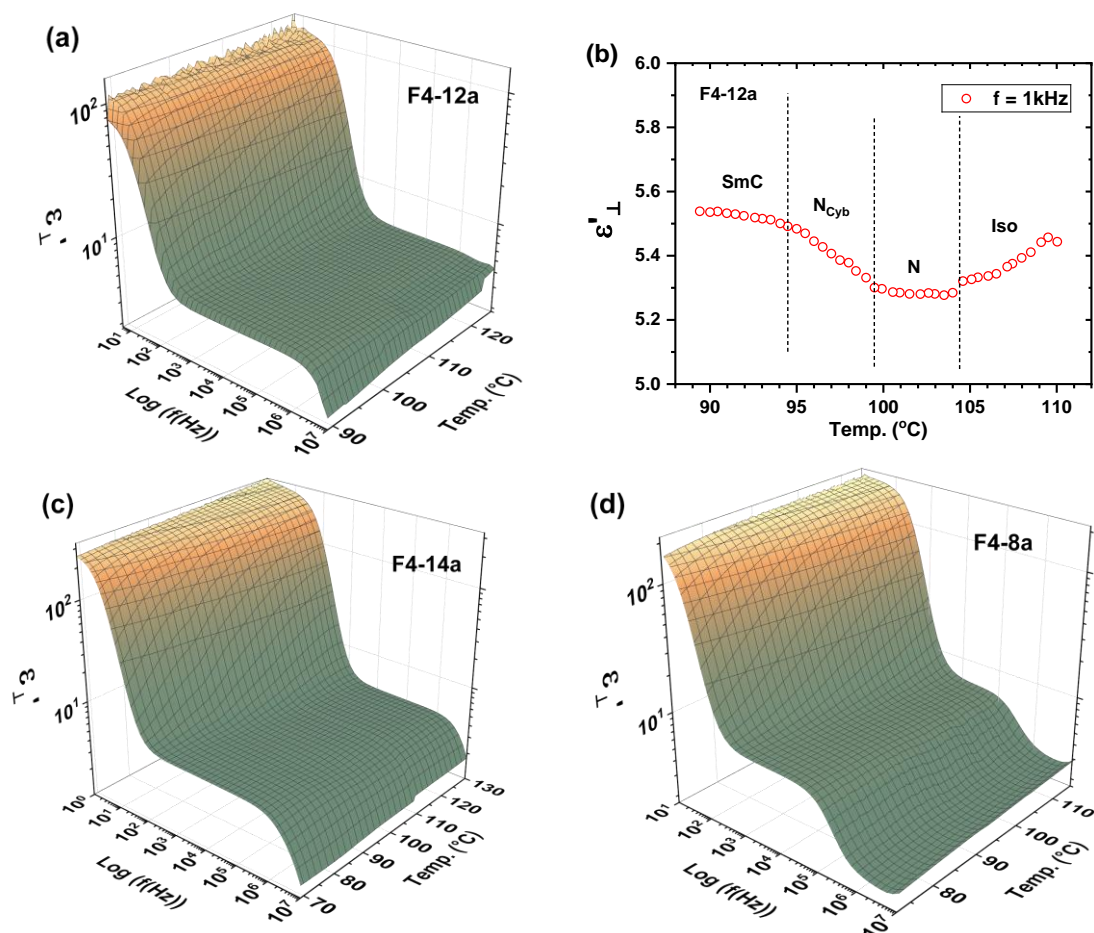

**Fig. S21** Dielectric permittivity ( $\epsilon'$ ) as a function of temperature and frequency for (a) **F4-12a**, (c) **F4-14a** and (d) **F4-8a** compounds filled in planar cells of  $9\mu\text{m}$  thickness (b) The variation of  $\epsilon'$  as a function of temperature at  $f = 1\text{kHz}$  for **F4-12a** molecule.

## 9. Spontaneous Polarization Studies

The spontaneous polarization ( $P_s$ ) properties of the **F4-na** series of compounds were investigated using the field-induced repolarization current technique<sup>3, 4</sup> to assess the presence and nature of macroscopic polar ordering (ferroelectric properties). A triangular wave voltage (1 Hz-2 kHz, up to a large magnitude of  $12 \text{ V}_{pp} \mu\text{m}^{-1}$ ) was applied across a  $9 \mu\text{m}$  planar LC cell, and the electrical response was measured using a  $1 \text{ k}\Omega$  or  $10 \text{ k}\Omega$  test resistance. No measurable  $P_s$  was observed in the current responses obtained. **Fig. S22** and **S23** display the electrical response for **F4-14a** and **F4-8a**, respectively. The absence of measurable  $P_s$  is surprising, especially considering that dielectric spectroscopy results revealed the presence of cybotactic clustering, a collective relaxation process, and large  $\epsilon'$  values in all three studied LC compounds ( $n = 8, 12, 14$ ). Typically, cybotactic clusters in bent-core or U-shaped LC molecules form due to strong short-range polar ordering between molecules and are often considered a direct indicator of macroscopic polar ordering within the LC system.<sup>5, 6</sup> However, despite the presence of these clusters, no such polar ordering was detected in the electrical response of these compounds.

In the present case, despite the existence of clusters, there is no ferroelectric-like response in any of the LC phases of the studied homologues. This lack of response may occur if the LC molecules within the clusters are oriented anti-parallel to each other, resulting in a lower net dipole moment for the cybotactic clusters. Consequently, achieving macroscopic ferroelectric ordering becomes difficult, even with large cluster sizes. Similar findings for unsymmetrical bent-core molecules have been reported<sup>7, 8</sup> by Patranabish et al. and Nafees et al. Their studies demonstrated that increasing terminal chain lengths in these molecules suppresses polar ordering within the LC mesophases, as longer terminal chains tend to favor anti-parallel alignment to minimize steric effects. This behavior may explain the inability of our molecular samples to form ferroelectric LC mesophases.

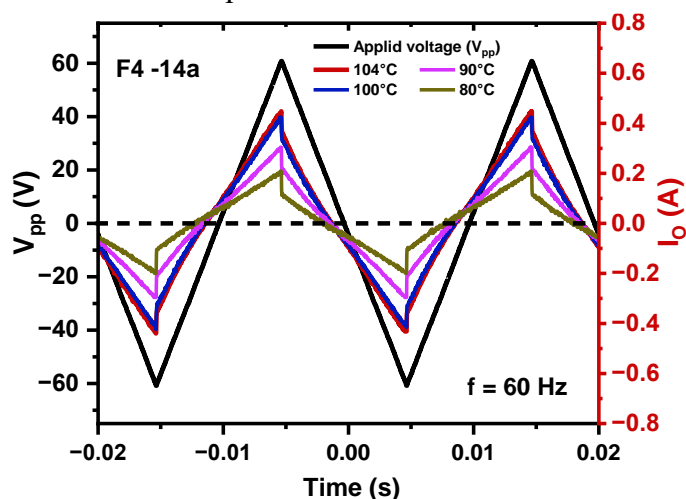

**Fig. S22** Current response curve to a triangular wave input voltage for **F4-14a** in a planar cell of  $9 \mu\text{m}$  thickness.

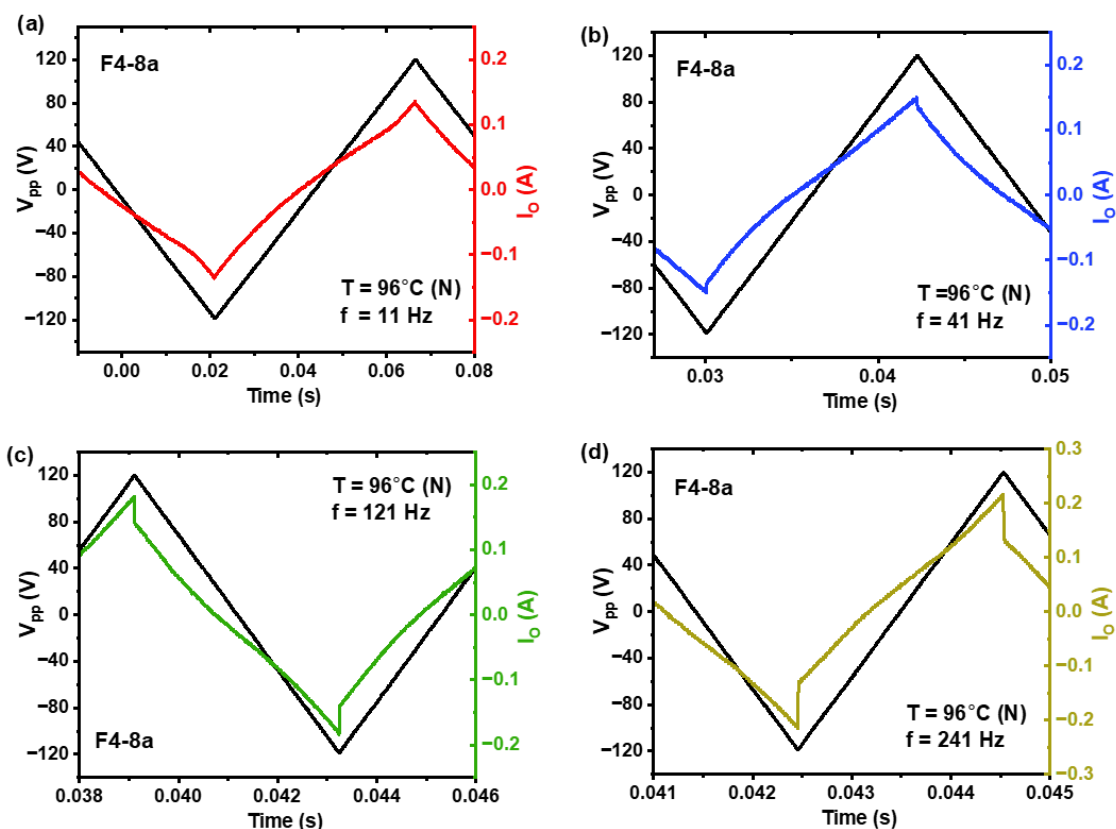

**Fig. S23** Current response for a triangular input voltage for **F4-8a** in a planar cell of 9  $\mu\text{m}$  thickness. In the N phase of **F4-8a**, a magnitude of input voltage ( $\sim 12 \text{ V}/\mu\text{m}$ ) was applied across varied frequencies, but still no polarization peak was observed.

## 10. Electroconvection Studies

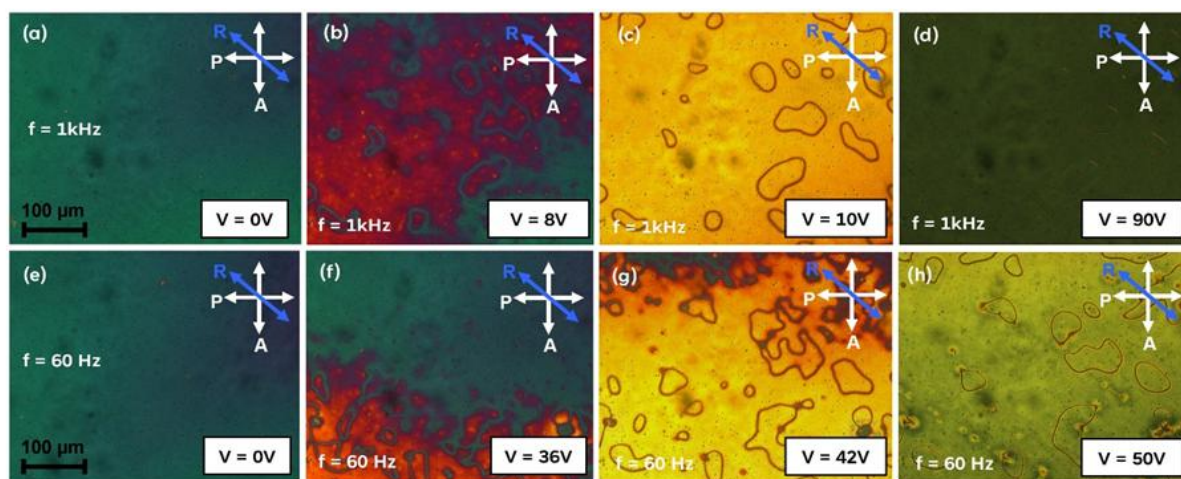

**Fig. S24** Optical micrographs showing the response of **F4-12a** molecule in the N phase ( $T = 104^\circ\text{C}$ ) under the action of applied AC voltage at two different frequencies,  $f = 1\text{kHz}$  (**a-d**) and  $f = 60\text{Hz}$  (**e-h**). The POM textures are taken under crossed polarizers with rubbing direction (R) at  $45^\circ$  to either of the polarizer and analyzer. We have observed that under the action of external voltage at either of the frequencies, **F4-12a** exhibits a conventional FT which is facilitated by domain formations (**c,g**).



**Table S6.** Formation of BP observed in various mixtures (observed at cooling rate 5 °C min<sup>-1</sup>), indicating initial and final temperatures recorded during cooling, along with the corresponding temperature range (presented within brackets []) in °C, where Iso: Isotropic, BP: Blue Phase. BP converts to the N\* phase below the mentioned temperatures.

| F4-na  | BP temperature range for weight % composition F4-na:5CB:S811 |                        |                        |
|--------|--------------------------------------------------------------|------------------------|------------------------|
|        | 35:45:20                                                     | 25:45:30               | 45:25:30               |
| n = 8  | Iso 50.2 BP 43.9 [6.3]                                       | Iso 29.9 BP 27.1 [2.8] | Iso 51.7 BP 43.9 [7.8] |
| n = 12 | Iso 51.4 BP 43.3 [8.1]                                       | Iso 29.2 BP 23.9 [5.3] | Iso 54.7 BP 50.4 [4.3] |
| n = 14 | Iso 54.4 BP 52.3 [2.1]                                       | Iso 36.2 BP 34.1 [2.1] | ---                    |
| n = 16 | Iso 47.5 BP 45.1 [2.4]                                       | ---                    | ---                    |
| n = 18 | ---                                                          | ---                    | ---                    |

**Table S7.** Formation of BP observed in various mixtures (observed at cooling rate 5 °C min<sup>-1</sup>), indicating initial and final temperatures recorded during cooling, along with the corresponding temperature range in °C. BP converts to the N\* phase below the mentioned temperatures.

| Composition<br>F4-8a:5CB:S811 | Transition temperatures<br>for BP (°C) | Total BP range (°C) |
|-------------------------------|----------------------------------------|---------------------|
| 90:0:10                       | Iso 81.8 BP 70.8                       | 11.0                |
| 80:0:20                       | Iso 51.9 BP 74.8                       | 22.9                |
| 70:0:30                       | Iso 64.5 BP 48.0                       | 16.5                |
| 60:0:40                       | Iso 46.1 BP 41.2                       | 4.9                 |
| 50:0:50                       | ---                                    | ---                 |
| 15:55:30                      | Iso 25.0 BP 19.2                       | 5.8                 |
| 20:50:30                      | Iso 28.6 BP 23.2                       | 5.4                 |
| 25:45:30                      | Iso 29.9 BP 27.1                       | 2.8                 |
| 30:40:30                      | Iso 36.9 BP 28.0                       | 8.9                 |
| 35:35:30                      | Iso 40.3 BP 35.9                       | 4.4                 |
| 40:30:30                      | Iso 46.7 BP 41.1                       | 5.6                 |
| 45:25:30                      | Iso 51.7 BP 43.9                       | 7.8                 |
| 50:20:30                      | Iso 49.5 BP 46.2                       | 3.3                 |
| 55:15:30                      | Iso 51.4 BP 48.5                       | 2.9                 |
| 15:40:45                      | ---                                    | ---                 |
| 20:40:40                      | ---                                    | ---                 |
| 25:40:35                      | ---                                    | ---                 |
| 30:40:30                      | Iso 36.9 BP 28.0                       | 8.9                 |
| 35:40:25                      | Iso 41.2 BP 33.8                       | 7.4                 |
| 40:40:20                      | Iso 48.3 BP 41.1                       | 7.2                 |
| 45:40:15                      | Iso 54.7 BP 51.3                       | 3.4                 |
| 50:40:10                      | Iso 69.9 BP 68.2                       | 1.7                 |
| 55:40:5                       | ---                                    | ---                 |

## 12. Density Functional Theory Calculations

Density functional theory (DFT) calculations on **F4-na** were performed using Gaussian 16 package and GaussView 5.0. Geometry optimizations were conducted employing the B3LYP exchange-correlation functional and a 6-31G (d,p) basis set, without imposing geometry constraints. These optimizations provided valuable insights<sup>1</sup> into the dipole moment, molecular conformation in space (bent architecture), as well as bond lengths and bond angles. Additionally, the HOMO-LUMO orbitals and electrostatic potential distribution over the molecular surface were visualized. A high HOMO-LUMO gap of  $\sim 4.16$  eV signifies a higher energy threshold for electronic transitions. The HOMO/LUMO and ESP analyses provide insights into the overall electron density distribution of the bent-shaped molecule investigated in this work. They offer valuable information for understanding, probing, and potentially connecting the polarization behavior of bent-core molecules under an electric field. These further provide a deeper understanding of molecular polarity and its impact on phase behavior along with information about the kinetic stability of the system.<sup>9</sup> However, this aspect of the study is beyond the scope of the present manuscript. The relevant data is presented in **Fig. S26-S28** and **Table S8**.

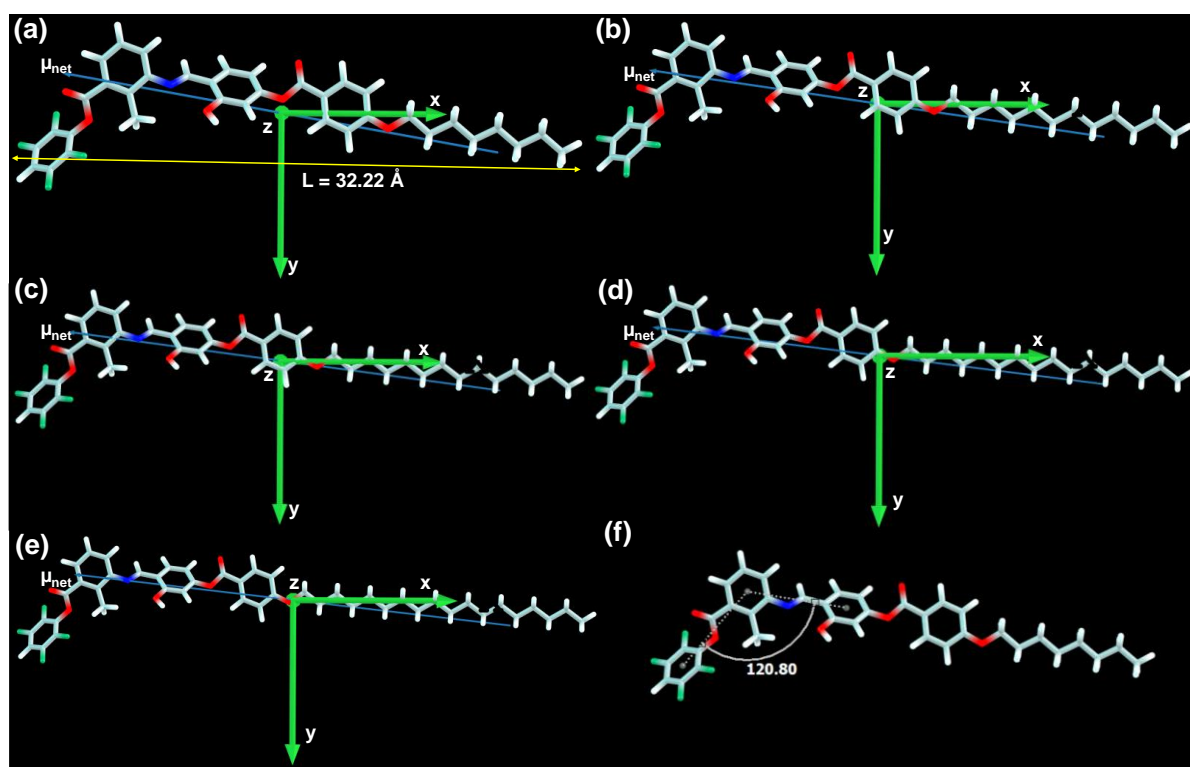

**Fig. S26** DFT-optimized structures of **F4-na** bent-core compounds are presented, with the coordinate system shown in the figure indicating the x, y, and z axes. The blue arrow represents the net dipole moment direction ( $\mu_{\text{net}}$ ). (a)-(e) depict optimized structures for different homologues **F4-na** ( $n = 8, 12, 14, 16$ , and  $18$ , respectively). The molecular length ( $L$ ) is illustrated by the yellow line, calculated from the terminal fluorine (F) of the aromatic ring end to the terminal hydrogen (H) of the chain end. Further, (f) illustrates the bent angle in **F4-8a**, measured from the center of the molecular core to the centroid of the adjacent rings.



**Table S8.** Parameters calculated from DFT-optimized structures.

| Compound | $\mu_{\text{resultant}} = (\mu_x^2 + \mu_y^2 + \mu_z^2)^{1/2}$<br>(Debye) | Bend-angle<br>(°) | Molecular<br>Length, L (Å) | HOMO<br>(eV) | LUMO<br>(eV) |
|----------|---------------------------------------------------------------------------|-------------------|----------------------------|--------------|--------------|
| F4-8a    | 9.32                                                                      | 120.8             | 32.22                      | -5.81        | -1.65        |
| F4-12a   | 9.36                                                                      | 120.7             | 37.30                      | -5.81        | -1.65        |
| F4-14a   | 9.37                                                                      | 120.8             | 39.88                      | -5.81        | -1.65        |
| F4-16a   | 9.38                                                                      | 120.8             | 42.44                      | -5.81        | -1.65        |
| F4-18a   | 9.38                                                                      | 120.8             | 45.00                      | -5.81        | -1.65        |

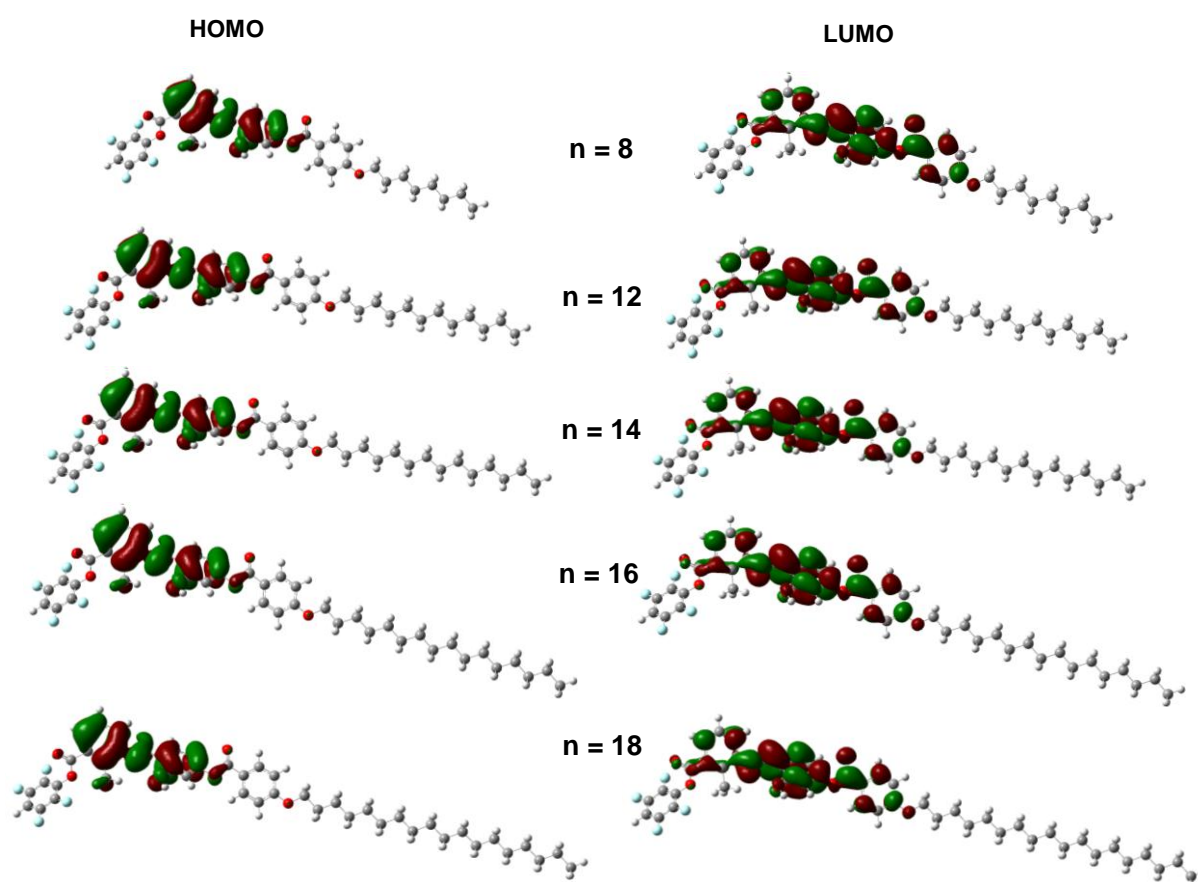

**Fig S27** Optimized geometries of the **F4-na** series showing HOMO and LUMO molecular orbitals.

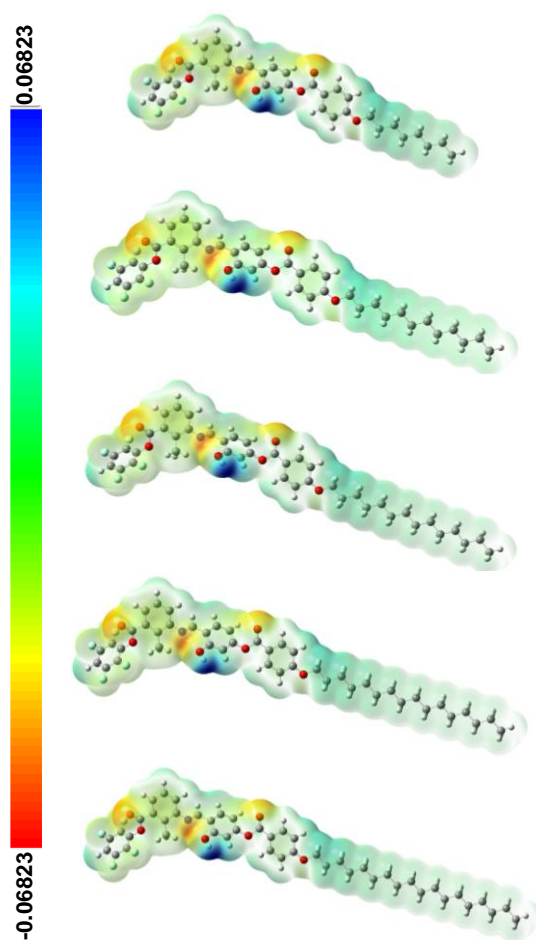

**Fig. S28** Distribution of Electrostatic Potential (ESP) across the molecular surface, revealing polar regions influenced by the highly fluorinated terminal group and bent-core architecture.

### 13. References

1. A. Baghla, V. Punjani, D. S. Rao, S. K. Prasad and S. K. Pal, *J. Mater. Chem. C*, 2024, **12**, 3915-3923.
2. S. Kaur, G. Mohiuddin, J. Zhang, S. Chakraborty, X. Ding, D. Verma, A. Sinha, Y. Xiang and S. K. Pal, *J. Mol. Liq.*, 2023, **387**, 122626.
3. G. Shanker, M. Nagaraj, A. Kocot, J. K. Vij, M. Prehm and C. Tschierske, *Adv. Funct. Mater.*, 2012, **22**, 1671-1683.
4. G. Shanker, M. Prehm, M. Nagaraj, J. K. Vij, M. Weyland, A. Eremin and C. Tschierske, *ChemPhysChem*, 2014, **15**, 1323-1335.
5. S. Ghosh, N. Begum, S. Turlapati, S. K. Roy, A. K. Das and N. V. Rao, *J. Mater. Chem. C*, 2014, **2**, 425-431.
6. N. Sebastián, S. Belau, A. Eremin, M. Alaasar, M. Prehm and C. Tschierske, *Physical Chemistry Chemical Physics*, 2017, **19**, 5895-5905.
7. S. Patranabish, G. Mohiuddin, N. Begum, A. R. Laskar, S. K. Pal, N. V. Rao and A. Sinha, *J. Mol. Liq.*, 2018, **257**, 144-154.
8. A. Nafees, G. Kalita, M. K. Paul, A. Sinha and N. V. Rao, *RSC Adv.*, 2015, **5**, 7001-7006.
9. D. Bhattacharjee, T. K. Devi, R. Dabrowski and A. Bhattacharjee, *J. Mol. Liq.*, 2018, **272**, 239-252.
